# Supplementary material for: Application of machine learning techniques to tuberculosis drug resistance analysis
Source: PubMed Central journal article supplement (PMC6596891; doi:10.1093/bioinformatics/bty949), 2018-11-21
Supplement: bty949_supplementary_data.pdf [file bty949_supplementary_data.pdf]

# Application of machine learning techniques to tuberculosis drug resistance analysis

Samaneh Kouchaki, Yang Yang, Timothy M. Walker, A. Sarah Walker, Daniel J. Wilson, Timothy E.A. Peto, Derrick W. Crook, David A. Clifton, and CRYPTIC consortium

## Abbreviations

Amikacin (AK)  
Area under curve (AUC)  
Capreomycin (CAP)  
Ciprofloxacin (CIP)  
Cross validation (CV)  
Direct association (DA)  
Ethambutol (EMB)  
Fluoroquinolones-ofloxacin (OFX)  
Gradient tree boosting (GBT)  
Isoniazid (INH)  
Kanamycin (KAN)  
Logistic regression (LR)  
Multidrug-resistant TB (MDR-TB)  
Moxifloxacin (MOX)  
Mycobacterium tuberculosis (MTB)  
Non-negative matrix factorisation (NMF)  
Principal components analysis (PCA)  
product-of-marginals (PM)  
Pyrazinamide (PZA)  
Radial basis function (RBF)  
Random forest (RF)  
Rifampicin (RIF)  
Singular value decomposition (SVD)  
Single nucleotide polymorphisms (SNPs)  
Sparse non-negative matrix factorisation (SNMF)  
Sparse principal components analysis (SPCA)  
Streptomycin (SM)  
Support vector machine (SVM)  
Tuberculosis (TB)  
Whole genome sequencing (WGS)

Supplementary A

Table 1. Classification methods, their parameter settings, and pros and cons.

| Method   | Summary                                                                                                                                                                                                                                                                                                                                                                                                                                                                                                                                                                                                                                                                          | Parameter setting                                                                                                                                                                               | Pros and cons                                                                                                                                                                                                                                                                                               |
|----------|----------------------------------------------------------------------------------------------------------------------------------------------------------------------------------------------------------------------------------------------------------------------------------------------------------------------------------------------------------------------------------------------------------------------------------------------------------------------------------------------------------------------------------------------------------------------------------------------------------------------------------------------------------------------------------|-------------------------------------------------------------------------------------------------------------------------------------------------------------------------------------------------|-------------------------------------------------------------------------------------------------------------------------------------------------------------------------------------------------------------------------------------------------------------------------------------------------------------|
| LR       | LR is a linear model that optimises a set of weights for each feature that lead to the best classification performance. Adding a regularisation term to penalise large values in the weight vector can prevent overfitting.                                                                                                                                                                                                                                                                                                                                                                                                                                                      | This model was performed using LIBLINEAR library and L1 or L2 regularisation (LR-L1 and LR-L2).                                                                                                 | LR is easy to implement and efficient to train and provides probabilities for outcomes. However LR cannot solve non-linear problems due to its linear decision surface and has high bias.                                                                                                                   |
| SVM      | SVM is a binary classifier that works based on finding the widest hyperplane margin to separate samples in the feature space. The hyperplane is optimised by maximising its distance to closest training points of each class, defined as support vectors. The data is not always linearly separable and hence a kernel function may transfer the data into a linearly separable space and improve the performance.                                                                                                                                                                                                                                                              | This model was run using LIBSVM. Radial basis function (SVM-RBF) and linear (SVM-Linear) kernels were considered in this work in which Optunity package was used to optimise kernel parameters. | SVM has a convex optimisation and also can work for both linear and non-linear separable data. It also can handle high dimensional data. However, it needs enough samples from both positive and negative classes and it is susceptible to overfitting. Furthermore, it needs a lot of memory and CPU time. |
| PM       | PM is a generative model and is based on class conditional independence of variables. Although its assumptions do not usually hold, PM often performs well. Regarding TB analysis, the PM method calculates the probability that an isolate has a given SNP. The prediction for a new data point is then calculated from the probability of each class label, given a new example and the training data.                                                                                                                                                                                                                                                                         | A Beta(1,0.25) prior for the resistant class and a Beta(0.25,1) prior for the susceptible class were considered.                                                                                | PM is fast to predict labels and can work with high dimensional data. Nevertheless if there is a category with no training data, the model will assign a zero probability (unable to predict it). Its other limitation is the independence assumption.                                                      |
| RF       | RF is an averaging method that is based on building several independent classifiers. This model fits a number of decision tree (DT) classifiers on different subsets of the dataset and average results to produce final predictions and improve the performance.                                                                                                                                                                                                                                                                                                                                                                                                                | 100 estimators were considered for RF training.                                                                                                                                                 | It is based on training of several independent trees that can be fit in parallel. Moreover, RF usually reduce the variance. However, it needs heavier computational resources.                                                                                                                              |
| Adaboost | Adaboost is a boosting method based on sequentially building weak estimators (models that are only slightly better than the random prediction, i.e. small DTs). Initially, all data samples have the same weight. However, at successive iterations, the weights of mislabelled training samples by the boosted model at the previous step are increased, while the weights are decreased for the remaining training samples. Hence, as iterations proceed, the influence of difficult samples is increased. Later, it combines the predictions through a weighted majority vote with the aim of reducing the bias of the combined classifier and producing a powerful ensemble. | DT used as the base classifier and 100 estimators were considered for the training.                                                                                                             | It is not subject to overfitting but is sensitive to noisy data and outliers. Moreover, due to sequentially building of trees, Adaboost cannot be parallelized.                                                                                                                                             |
| GBT      | GBT is a generalisation of boosting to an arbitrary differentiable loss function.                                                                                                                                                                                                                                                                                                                                                                                                                                                                                                                                                                                                | DT used as the base classifier and Binomial deviance and 100 estimators were considered for the training.                                                                                       | It is more robust to outliers and has high predictive power. Nonetheless, similar to Adaboost and due to the sequential nature, it cannot be parallelised.                                                                                                                                                  |

Supplementary B

Table 2. Comparing the performance of DA and various machine learning techniques and the dimension reduction stage for INH and F1-F3.

| Method     | F1           |              |              |                     |                     | F2            |              |              |                     |                     | F3           |              |              |                     |                     |
|------------|--------------|--------------|--------------|---------------------|---------------------|---------------|--------------|--------------|---------------------|---------------------|--------------|--------------|--------------|---------------------|---------------------|
|            | Accuracy     | Sensitivity  | Specificity  | AUC                 | F1-score            | Accuracy      | Sensitivity  | Specificity  | AUC                 | F1-Score            | Accuracy     | Sensitivity  | Specificity  | AUC                 | F1-Score            |
| DA         | 96.65 ± 0.34 | 91.95 ± 1.04 | 98.71 ± 0.22 | 94.95 ± 0.54        | 93.72 ± 0.66        | 96.65 ± 0.34  | 91.95 ± 1.04 | 98.71 ± 0.22 | 94.95 ± 0.54        | 93.72 ± 0.66        | 96.65 ± 0.34 | 91.95 ± 1.04 | 98.71 ± 0.22 | 94.95 ± 0.54        | 93.72 ± 0.66        |
| SVM-RBF    | 96.37 ± 0.29 | 91.17 ± 1.11 | 98.30 ± 0.30 | 97.26 ± 0.38        | 93.24 ± 0.55        | 92.89 ± 13.38 | 87.16 ± 1.13 | 98.32 ± 1.41 | 95.19 ± 0.60        | 89.59 ± 9.64        | 95.87 ± 0.49 | 87.83 ± 1.94 | 98.90 ± 0.27 | <b>96.50 ± 0.43</b> | 92.09 ± 1.02        |
| SVM-Linear | 96.37 ± 0.42 | 92.68 ± 0.94 | 97.56 ± 0.38 | 97.23 ± 0.43        | 93.33 ± 0.74        | 96.35 ± 0.33  | 89.99 ± 1.10 | 98.76 ± 0.23 | 94.68 ± 0.43        | 93.12 ± 0.66        | 96.51 ± 0.40 | 90.98 ± 1.32 | 98.60 ± 0.26 | 95.29 ± 0.59        | <b>93.47 ± 0.78</b> |
| PM         | 91.10 ± 2.20 | 82.41 ± 3.28 | 95.43 ± 0.95 | 94.56 ± 0.69        | 83.73 ± 2.88        | 96.37 ± 0.29  | 90.14 ± 0.87 | 98.73 ± 0.24 | <b>95.25 ± 0.45</b> | 93.16 ± 0.55        | 96.16 ± 0.31 | 90.82 ± 0.99 | 98.18 ± 0.38 | 96.12 ± 0.44        | 92.85 ± 0.58        |
| LR-L1      | 96.62 ± 0.31 | 92.54 ± 1.02 | 98.17 ± 0.31 | 97.61 ± 0.39        | 93.76 ± 0.59        | 96.32 ± 0.38  | 89.86 ± 1.16 | 98.75 ± 0.26 | 94.72 ± 0.60        | 93.04 ± 0.74        | 96.37 ± 0.34 | 90.13 ± 1.02 | 98.73 ± 0.22 | 95.11 ± 0.54        | 93.16 ± 0.66        |
| LR-L2      | 96.68 ± 0.30 | 92.19 ± 0.94 | 98.38 ± 0.29 | <b>97.89 ± 0.38</b> | <b>93.84 ± 0.56</b> | 96.27 ± 0.37  | 89.65 ± 1.18 | 98.77 ± 0.22 | 94.91 ± 0.51        | 92.95 ± 0.73        | 96.29 ± 0.28 | 89.72 ± 0.93 | 98.79 ± 0.22 | 95.81 ± 0.45        | 93.00 ± 0.55        |
| RF         | 96.01 ± 0.41 | 92.72 ± 1.08 | 97.26 ± 0.64 | 97.62 ± 0.32        | 92.74 ± 0.70        | 96.41 ± 0.36  | 90.24 ± 1.10 | 98.74 ± 0.25 | 94.91 ± 0.52        | <b>93.23 ± 0.69</b> | 96.46 ± 0.30 | 90.70 ± 0.90 | 98.64 ± 0.25 | 95.62 ± 0.51        | 93.36 ± 0.59        |
| Adaboost   | 96.23 ± 0.33 | 90.84 ± 0.94 | 98.31 ± 0.25 | 96.77 ± 0.37        | 93.01 ± 0.62        | 96.08 ± 0.33  | 88.68 ± 1.16 | 98.88 ± 0.22 | 94.27 ± 0.49        | 92.54 ± 0.66        | 96.06 ± 0.33 | 88.63 ± 1.14 | 98.86 ± 0.25 | 94.24 ± 0.56        | 92.50 ± 0.67        |
| GBT        | 96.59 ± 0.39 | 91.77 ± 1.03 | 98.41 ± 0.32 | 97.26 ± 0.41        | 93.65 ± 0.74        | 96.33 ± 0.34  | 89.79 ± 1.02 | 98.80 ± 0.24 | 94.90 ± 0.50        | 93.07 ± 0.66        | 96.26 ± 0.35 | 89.38 ± 1.11 | 98.86 ± 0.24 | 95.29 ± 0.50        | 92.91 ± 0.69        |

| Method     | SNMF         |              |              |                     |                     | SPCA         |              |              |                     |                     |
|------------|--------------|--------------|--------------|---------------------|---------------------|--------------|--------------|--------------|---------------------|---------------------|
|            | SNMF-F1      |              |              |                     |                     | SPCA-F1      |              |              |                     |                     |
|            | Accuracy     | Sensitivity  | Specificity  | AUC                 | F1-Score            | Accuracy     | Sensitivity  | Specificity  | AUC                 | F1-Score            |
| SVM-RBF    | 94.94 ± 2.46 | 87.43 ± 2.62 | 97.77 ± 2.70 | 96.61 ± 1.07        | 90.55 ± 4.12        | 95.96 ± 0.39 | 91.63 ± 1.28 | 97.60 ± 0.77 | 96.87 ± 0.36        | 92.56 ± 0.66        |
| SVM-Linear | 95.92 ± 0.34 | 88.38 ± 1.13 | 98.77 ± 0.23 | 97.08 ± 0.41        | 92.38 ± 0.68        | 96.11 ± 0.41 | 90.94 ± 1.38 | 98.07 ± 0.59 | 96.70 ± 0.49        | 92.77 ± 0.76        |
| PM         | 87.12 ± 0.55 | 81.91 ± 1.72 | 89.09 ± 0.78 | 92.04 ± 0.64        | 77.72 ± 0.93        | 77.22 ± 4.52 | 69.38 ± 4.10 | 80.18 ± 7.49 | 84.47 ± 1.07        | 62.97 ± 4.32        |
| LR-L1      | 95.66 ± 0.36 | 86.70 ± 1.27 | 99.04 ± 0.21 | 96.00 ± 0.49        | 91.63 ± 0.74        | 95.77 ± 0.39 | 87.31 ± 1.21 | 98.96 ± 0.23 | 96.22 ± 0.50        | 91.87 ± 0.77        |
| LR-L2      | 85.79 ± 0.63 | 74.89 ± 1.45 | 89.91 ± 0.74 | 91.26 ± 0.80        | 74.30 ± 1.08        | 92.42 ± 0.40 | 75.69 ± 1.39 | 98.74 ± 0.22 | 96.52 ± 0.39        | 84.55 ± 0.91        |
| RF         | 95.58 ± 0.78 | 92.46 ± 1.34 | 96.79 ± 1.14 | 97.25 ± 0.36        | 92.01 ± 1.22        | 95.48 ± 0.68 | 92.02 ± 1.25 | 97.66 ± 0.46 | 97.12 ± 0.37        | 91.79 ± 1.10        |
| Adaboost   | 96.04 ± 0.44 | 92.96 ± 1.04 | 97.21 ± 0.53 | 97.55 ± 0.40        | 92.80 ± 0.79        | 96.32 ± 0.35 | 91.64 ± 1.05 | 98.09 ± 0.35 | 97.20 ± 0.38        | <b>93.18 ± 0.66</b> |
| GBT        | 96.25 ± 0.33 | 92.18 ± 0.98 | 97.79 ± 0.42 | <b>97.65 ± 0.35</b> | <b>93.10 ± 0.63</b> | 96.30 ± 0.34 | 91.23 ± 0.89 | 98.21 ± 0.34 | <b>97.21 ± 0.38</b> | 93.11 ± 0.57        |

Table 3. Comparing the performance of DA and various machine learning techniques and the dimension reduction stage for EMB and F1-F3.

| Method     | F1           |              |              |                     |                     | F2           |              |              |                     |                     | F3           |              |              |                     |                     |
|------------|--------------|--------------|--------------|---------------------|---------------------|--------------|--------------|--------------|---------------------|---------------------|--------------|--------------|--------------|---------------------|---------------------|
|            | Accuracy     | Sensitivity  | Specificity  | AUC                 | F1-Score            | Accuracy     | Sensitivity  | Specificity  | AUC                 | F1-Score            | Accuracy     | Sensitivity  | Specificity  | AUC                 | F1-Score            |
| DA         | 93.64 ± 0.41 | 83.31 ± 1.62 | 95.17 ± 0.38 | 89.24 ± 0.85        | 77.16 ± 1.38        | 93.64 ± 0.41 | 83.31 ± 1.62 | 95.17 ± 0.38 | 89.24 ± 0.85        | 77.16 ± 1.38        | 93.64 ± 0.41 | 83.31 ± 1.62 | 95.17 ± 0.38 | 89.24 ± 0.85        | 77.16 ± 1.38        |
| SVM-RBF    | 91.36 ± 0.84 | 93.08 ± 1.62 | 91.10 ± 1.07 | 95.80 ± 0.49        | 73.57 ± 1.84        | 86.98 ± 2.85 | 80.71 ± 1.34 | 87.91 ± 5.93 | 88.68 ± 5.60        | 71.28 ± 4.53        | 93.75 ± 0.45 | 88.05 ± 2.24 | 94.57 ± 0.45 | 94.42 ± 0.71        | 78.34 ± 1.49        |
| SVM-Linear | 92.05 ± 0.89 | 91.32 ± 1.71 | 92.16 ± 1.07 | 95.72 ± 0.64        | 74.82 ± 2.09        | 93.61 ± 0.45 | 83.00 ± 1.84 | 95.18 ± 0.40 | 89.32 ± 0.92        | 77.01 ± 1.53        | 93.66 ± 0.50 | 89.33 ± 1.76 | 94.30 ± 0.62 | 94.39 ± 0.74        | 78.43 ± 1.40        |
| PM         | 90.52 ± 1.94 | 88.67 ± 1.82 | 90.79 ± 2.27 | 94.18 ± 0.75        | 70.89 ± 3.72        | 93.63 ± 0.35 | 83.25 ± 1.74 | 95.17 ± 0.34 | 89.77 ± 0.94        | 77.12 ± 1.21        | 91.41 ± 3.75 | 83.66 ± 3.65 | 92.56 ± 4.74 | 92.73 ± 0.89        | 72.52 ± 6.84        |
| LR-L1      | 92.19 ± 0.81 | 91.86 ± 1.63 | 92.33 ± 0.98 | 95.97 ± 0.62        | <b>75.23 ± 1.96</b> | 93.63 ± 0.39 | 83.21 ± 1.61 | 95.17 ± 0.40 | <b>89.80 ± 0.87</b> | <b>77.10 ± 1.26</b> | 93.94 ± 0.45 | 89.18 ± 1.63 | 94.64 ± 0.45 | 95.21 ± 0.55        | <b>79.14 ± 1.37</b> |
| LR-L2      | 91.92 ± 0.63 | 92.12 ± 1.84 | 91.89 ± 0.84 | <b>96.25 ± 0.54</b> | 74.65 ± 1.46        | 93.62 ± 0.39 | 83.15 ± 1.64 | 95.17 ± 0.37 | 89.77 ± 0.88        | 77.06 ± 1.33        | 93.81 ± 0.37 | 89.04 ± 1.65 | 94.52 ± 0.37 | <b>95.38 ± 0.59</b> | 78.77 ± 1.18        |
| RF         | 90.08 ± 1.13 | 91.79 ± 2.06 | 89.82 ± 1.50 | 95.31 ± 0.47        | 70.54 ± 2.17        | 93.56 ± 0.38 | 81.59 ± 2.76 | 95.33 ± 0.43 | 89.71 ± 1.17        | 76.55 ± 1.44        | 93.39 ± 0.55 | 87.40 ± 1.61 | 94.97 ± 0.55 | 94.97 ± 0.55        | 77.34 ± 1.59        |
| Adaboost   | 89.01 ± 0.51 | 88.92 ± 1.93 | 89.03 ± 0.60 | 94.37 ± 0.64        | 67.61 ± 1.21        | 93.56 ± 0.43 | 79.12 ± 2.15 | 95.55 ± 0.40 | 88.50 ± 0.97        | 75.64 ± 1.32        | 92.96 ± 2.14 | 80.69 ± 2.95 | 94.77 ± 0.27 | 92.78 ± 0.90        | 75.07 ± 4.11        |
| GBT        | 90.28 ± 1.06 | 92.68 ± 1.87 | 89.93 ± 1.35 | 95.49 ± 0.53        | 71.16 ± 2.16        | 93.55 ± 0.43 | 82.06 ± 2.37 | 95.26 ± 0.45 | 89.77 ± 1.07        | 76.66 ± 1.51        | 94.00 ± 0.45 | 87.05 ± 1.87 | 95.03 ± 0.44 | 94.86 ± 0.58        | 78.92 ± 1.45        |

| SNMF       |              |              |              |                     |                     | SPCA         |              |              |                     |                     |
|------------|--------------|--------------|--------------|---------------------|---------------------|--------------|--------------|--------------|---------------------|---------------------|
| SNMF-F1    |              |              |              |                     |                     | SPCA-F1      |              |              |                     |                     |
| Method     | Accuracy     | Sensitivity  | Specificity  | AUC                 | F1-Score            | Accuracy     | Sensitivity  | Specificity  | AUC                 | F1-Score            |
| SVM-RBF    | 90.99 ± 0.98 | 89.60 ± 1.92 | 91.96 ± 1.18 | 94.78 ± 0.74        | 71.99 ± 2.05        | 83.44 ± 3.76 | 90.18 ± 5.93 | 82.44 ± 7.81 | 89.18 ± 2.41        | 68.07 ± 5.85        |
| SVM-Linear | 91.36 ± 0.57 | 90.53 ± 1.74 | 91.48 ± 0.67 | 95.03 ± 0.65        | <b>72.99 ± 1.39</b> | 92.02 ± 0.58 | 89.65 ± 2.01 | 92.38 ± 0.79 | <b>95.62 ± 0.51</b> | 74.37 ± 1.36        |
| PM         | 85.38 ± 1.94 | 81.15 ± 2.47 | 85.99 ± 2.40 | 90.57 ± 0.98        | 59.00 ± 2.90        | 84.48 ± 5.30 | 73.49 ± 3.80 | 86.10 ± 6.42 | 86.95 ± 1.28        | 56.25 ± 7.92        |
| LR-L1      | 90.64 ± 0.91 | 88.88 ± 2.36 | 90.90 ± 1.18 | 94.49 ± 0.64        | 71.05 ± 1.97        | 90.29 ± 1.39 | 86.89 ± 2.94 | 90.79 ± 1.88 | 93.99 ± 0.66        | 69.89 ± 2.71        |
| LR-L2      | 84.30 ± 2.92 | 83.75 ± 2.21 | 90.93 ± 0.63 | 90.93 ± 0.63        | 57.90 ± 1.39        | 92.47 ± 0.49 | 86.80 ± 1.67 | 93.30 ± 0.55 | 95.57 ± 0.48        | <b>74.82 ± 1.38</b> |
| RF         | 88.99 ± 1.04 | 90.50 ± 1.94 | 88.77 ± 1.30 | 94.57 ± 0.64        | 68.00 ± 1.97        | 90.48 ± 0.75 | 88.95 ± 2.37 | 90.71 ± 0.99 | 94.75 ± 0.57        | 70.69 ± 1.61        |
| Adaboost   | 89.27 ± 0.67 | 93.69 ± 1.29 | 88.61 ± 0.78 | 95.31 ± 0.55        | 69.25 ± 1.40        | 89.60 ± 0.52 | 92.40 ± 1.45 | 89.18 ± 0.63 | 94.97 ± 0.52        | 69.60 ± 1.14        |
| GBT        | 90.83 ± 0.86 | 92.15 ± 1.76 | 90.64 ± 1.06 | <b>95.70 ± 0.52</b> | 72.19 ± 1.90        | 90.68 ± 0.77 | 92.30 ± 1.70 | 90.44 ± 0.94 | 95.58 ± 0.61        | 71.89 ± 1.70        |

Table 4. Comparing the performance of DA and various machine learning techniques and the dimension reduction stage for RIF and F1-F3.

| Method     | F1           |              |              |                     |                     | F2           |              |              |                     |                     | F3           |              |              |                     |                     |
|------------|--------------|--------------|--------------|---------------------|---------------------|--------------|--------------|--------------|---------------------|---------------------|--------------|--------------|--------------|---------------------|---------------------|
|            | Accuracy     | Sensitivity  | Specificity  | AUC                 | F1-Score            | Accuracy     | Sensitivity  | Specificity  | AUC                 | F1-Score            | Accuracy     | Sensitivity  | Specificity  | AUC                 | F1-Score            |
| DA         | 97.16 ± 0.30 | 91.70 ± 1.19 | 98.73 ± 0.22 | 95.22 ± 0.59        | 93.52 ± 0.71        | 97.16 ± 0.30 | 91.70 ± 1.19 | 98.73 ± 0.22 | 95.22 ± 0.59        | 93.52 ± 0.71        | 97.16 ± 0.30 | 91.70 ± 1.19 | 98.73 ± 0.22 | 95.22 ± 0.59        | 93.52 ± 0.71        |
| SVM-RBF    | 96.31 ± 0.70 | 93.03 ± 1.02 | 97.26 ± 0.99 | 97.89 ± 0.38        | 91.89 ± 1.40        | 87.13 ± 3.18 | 88.51 ± 2.40 | 87.45 ± 2.06 | 95.59 ± 0.55        | 84.60 ± 1.22        | 96.94 ± 0.37 | 90.36 ± 1.18 | 98.84 ± 0.28 | 96.00 ± 0.77        | 92.96 ± 0.91        |
| SVM-Linear | 96.67 ± 0.67 | 92.50 ± 0.89 | 97.87 ± 0.85 | 97.82 ± 0.40        | 92.56 ± 1.35        | 97.11 ± 0.23 | 98.77 ± 0.20 | 95.53 ± 0.70 | 95.12 ± 0.45        | 93.40 ± 0.53        | 97.13 ± 0.31 | 91.50 ± 1.10 | 98.76 ± 0.28 | 96.43 ± 0.73        | 93.46 ± 0.71        |
| PM         | 92.19 ± 2.56 | 87.79 ± 2.10 | 93.45 ± 3.72 | 95.86 ± 0.51        | 83.68 ± 4.05        | 97.10 ± 0.33 | 98.76 ± 0.21 | 95.51 ± 0.74 | <b>95.64 ± 0.58</b> | <b>93.37 ± 0.77</b> | 96.95 ± 0.31 | 91.00 ± 1.34 | 98.66 ± 0.24 | 96.65 ± 0.51        | 93.02 ± 0.73        |
| LR-L1      | 96.69 ± 0.49 | 92.27 ± 1.25 | 97.96 ± 0.77 | 97.96 ± 0.77        | <b>92.58 ± 1.01</b> | 97.08 ± 0.27 | 91.21 ± 0.89 | 98.77 ± 0.23 | 95.45 ± 0.47        | 93.33 ± 0.63        | 97.10 ± 0.26 | 91.04 ± 1.07 | 98.84 ± 0.22 | 96.50 ± 0.44        | 93.35 ± 0.62        |
| LR-L2      | 96.40 ± 0.42 | 92.77 ± 1.28 | 97.45 ± 0.63 | <b>98.08 ± 0.32</b> | 92.04 ± 0.88        | 97.03 ± 0.28 | 90.93 ± 1.02 | 98.79 ± 0.22 | 95.53 ± 0.52        | 93.20 ± 0.66        | 97.09 ± 0.34 | 90.92 ± 1.20 | 98.87 ± 0.25 | <b>96.78 ± 0.53</b> | 93.32 ± 0.80        |
| RF         | 95.15 ± 0.60 | 92.66 ± 1.18 | 95.87 ± 0.88 | 97.67 ± 0.42        | 89.54 ± 1.15        | 97.07 ± 0.33 | 90.80 ± 1.35 | 98.88 ± 0.23 | 95.50 ± 0.58        | 93.27 ± 0.78        | 97.17 ± 0.29 | 91.72 ± 1.10 | 99.43 ± 0.22 | 96.60 ± 0.51        | <b>93.53 ± 0.68</b> |
| Adaboost   | 94.10 ± 0.51 | 92.41 ± 1.34 | 94.59 ± 0.59 | 97.03 ± 0.46        | 87.52 ± 1.02        | 95.90 ± 0.33 | 83.61 ± 1.51 | 99.45 ± 0.20 | 92.30 ± 0.74        | 90.13 ± 0.87        | 95.91 ± 0.40 | 83.73 ± 1.97 | 99.43 ± 0.22 | 93.36 ± 0.75        | 90.16 ± 1.07        |
| GBT        | 95.40 ± 0.76 | 92.39 ± 1.34 | 96.27 ± 1.23 | 97.71 ± 0.35        | 90.02 ± 1.44        | 96.94 ± 0.30 | 89.90 ± 1.33 | 98.97 ± 0.18 | 95.41 ± 0.58        | 92.93 ± 0.73        | 96.98 ± 0.25 | 89.99 ± 1.19 | 98.99 ± 0.26 | 96.24 ± 0.40        | 93.02 ± 0.60        |

| SNMF       |              |              |              |                     |                     | SPCA         |              |              |                     |                     |
|------------|--------------|--------------|--------------|---------------------|---------------------|--------------|--------------|--------------|---------------------|---------------------|
| SNMF-F1    |              |              |              |                     |                     | SPCA-F1      |              |              |                     |                     |
| Method     | Accuracy     | Sensitivity  | Specificity  | AUC                 | F1-Score            | Accuracy     | Sensitivity  | Specificity  | AUC                 | F1-Score            |
| SVM-RBF    | 92.30 ± 1.27 | 87.12 ± 2.77 | 93.80 ± 1.86 | 96.66 ± 0.71        | 83.56 ± 2.18        | 95.44 ± 0.45 | 90.64 ± 1.36 | 96.82 ± 0.63 | 97.37 ± 0.39        | 89.89 ± 0.93        |
| SVM-Linear | 87.39 ± 1.94 | 87.07 ± 3.72 | 87.49 ± 3.45 | 94.73 ± 0.49        | 75.71 ± 2.55        | 95.62 ± 0.45 | 90.57 ± 1.17 | 97.08 ± 0.56 | 97.32 ± 0.41        | <b>90.26 ± 0.96</b> |
| PM         | 87.34 ± 1.43 | 84.59 ± 2.25 | 88.13 ± 2.19 | 93.39 ± 0.68        | 75.01 ± 1.95        | 85.46 ± 6.21 | 73.57 ± 3.76 | 88.88 ± 8.95 | 87.85 ± 1.16        | 70.60 ± 7.79        |
| LR-L1      | 94.04 ± 0.42 | 88.42 ± 1.41 | 95.66 ± 0.46 | 96.77 ± 0.51        | 86.90 ± 0.91        | 94.32 ± 0.90 | 89.59 ± 1.89 | 95.69 ± 1.55 | 96.59 ± 0.53        | 87.64 ± 1.62        |
| LR-L2      | 85.53 ± 0.76 | 77.61 ± 1.60 | 87.81 ± 0.85 | 90.96 ± 0.82        | 86.90 ± 0.91        | 94.75 ± 0.44 | 82.95 ± 1.54 | 98.15 ± 0.27 | 97.10 ± 0.47        | 87.60 ± 1.08        |
| RF         | 94.64 ± 0.94 | 92.06 ± 1.52 | 95.38 ± 1.48 | 97.39 ± 0.36        | 88.53 ± 1.71        | 95.65 ± 0.49 | 91.15 ± 1.15 | 97.66 ± 0.46 | 97.28 ± 0.39        | 90.37 ± 0.99        |
| Adaboost   | 95.38 ± 0.55 | 92.98 ± 1.02 | 96.07 ± 0.76 | 97.68 ± 0.41        | 90.02 ± 1.08        | 94.61 ± 0.46 | 93.05 ± 0.97 | 98.09 ± 0.35 | <b>97.63 ± 0.35</b> | 88.55 ± 0.92        |
| GBT        | 95.92 ± 0.53 | 92.30 ± 1.43 | 96.69 ± 0.77 | <b>97.79 ± 0.39</b> | <b>91.02 ± 1.07</b> | 95.63 ± 0.59 | 91.63 ± 1.48 | 98.21 ± 0.34 | 97.63 ± 0.98        | 90.37 ± 1.12        |

Table 5. Comparing the performance of DA and various machine learning techniques and the dimension reduction stage for PZA and F1-F3.

| Method     | F1           |              |              |                     |                     | F2           |              |              |                     |                     | F3            |               |               |                     |                     |
|------------|--------------|--------------|--------------|---------------------|---------------------|--------------|--------------|--------------|---------------------|---------------------|---------------|---------------|---------------|---------------------|---------------------|
|            | Accuracy     | Sensitivity  | Specificity  | AUC                 | F1-Score            | Accuracy     | Sensitivity  | Specificity  | AUC                 | F1-Score            | Accuracy      | Sensitivity   | Specificity   | AUC                 | F1-Score            |
| DA         | 92.15 ± 0.36 | 43.11 ± 2.97 | 98.46 ± 0.27 | 70.78 ± 1.46        | 55.55 ± 2.68        | 92.15 ± 0.36 | 43.11 ± 2.97 | 98.46 ± 0.27 | 70.78 ± 1.46        | 55.55 ± 2.68        | 92.15 ± 0.36  | 43.11 ± 2.97  | 98.46 ± 0.27  | 70.78 ± 1.46        | 55.55 ± 2.68        |
| SVM-RBF    | 88.80 ± 1.68 | 88.05 ± 2.53 | 88.90 ± 2.08 | 93.32 ± 0.86        | 64.39 ± 3.25        | 77.62 ± 3.03 | 52.91 ± 5.17 | 80.80 ± 2.12 | 68.43 ± 3.90        | 49.01 ± 3.54        | 88.95 ± 3.70  | 76.13 ± 5.43  | 90.59 ± 4.77  | <b>88.69 ± 1.64</b> | 62.06 ± 6.06        |
| SVM-Linear | 89.46 ± 1.52 | 87.01 ± 3.01 | 89.77 ± 1.92 | 93.11 ± 0.85        | <b>65.46 ± 2.98</b> | 90.45 ± 1.30 | 41.39 ± 4.85 | 96.76 ± 1.83 | 69.40 ± 1.51        | 52.88 ± 5.47        | 87.32 ± 3.40  | 73.68 ± 5.42  | 89.07 ± 4.40  | 85.15 ± 2.38        | 57.92 ± 6.58        |
| PM         | 88.16 ± 1.30 | 84.77 ± 2.69 | 88.60 ± 1.84 | 92.02 ± 1.05        | 62.14 ± 2.72        | 92.05 ± 0.43 | 39.79 ± 2.77 | 98.78 ± 0.28 | 68.04 ± 1.55        | <b>53.28 ± 2.94</b> | 84.34 ± 0.98  | 77.39 ± 2.30  | 85.23 ± 1.15  | 83.47 ± 1.52        | 53.02 ± 1.72        |
| LR-L1      | 89.25 ± 1.30 | 87.23 ± 3.04 | 89.51 ± 1.70 | 93.45 ± 0.90        | 65.03 ± 2.44        | 91.81 ± 0.42 | 34.92 ± 3.27 | 99.13 ± 2.43 | 68.12 ± 1.45        | 49.21 ± 3.58        | 84.21 ± 0.94  | 70.83 ± 2.99  | 85.94 ± 1.15  | 83.40 ± 1.30        | 50.60 ± 1.75        |
| LR-L2      | 88.82 ± 1.29 | 88.12 ± 2.65 | 88.91 ± 1.66 | <b>93.89 ± 0.80</b> | 64.36 ± 2.41        | 92.08 ± 0.43 | 39.59 ± 3.22 | 98.84 ± 0.29 | <b>69.59 ± 1.61</b> | 53.21 ± 3.21        | 84.32 ± 0.85  | 77.58 ± 2.64  | 85.19 ± 0.88  | 85.43 ± 1.38        | 53.03 ± 1.86        |
| RF         | 87.27 ± 1.57 | 87.60 ± 2.90 | 87.23 ± 1.96 | 93.18 ± 0.97        | 61.22 ± 2.74        | 92.06 ± 0.46 | 39.13 ± 3.07 | 98.87 ± 0.27 | 69.53 ± 1.46        | 52.86 ± 3.30        | 90.50 ± 3.79  | 65.35 ± 7.74  | 93.74 ± 5.16  | 86.17 ± 1.47        | <b>62.49 ± 6.99</b> |
| Adaboost   | 86.18 ± 0.67 | 85.17 ± 2.90 | 86.31 ± 0.69 | 91.63 ± 0.98        | 58.43 ± 1.74        | 90.48 ± 0.23 | 18.13 ± 2.05 | 99.79 ± 0.09 | 58.96 ± 1.01        | 30.21 ± 2.87        | 74.43 ± 21.23 | 56.23 ± 17.68 | 76.77 ± 26.20 | 71.74 ± 1.53        | 37.31 ± 6.34        |
| GBT        | 87.36 ± 1.46 | 88.49 ± 2.76 | 87.22 ± 1.86 | 92.82 ± 0.98        | 61.61 ± 2.54        | 91.93 ± 0.32 | 35.89 ± 2.52 | 99.14 ± 0.21 | 68.07 ± 1.29        | 50.31 ± 2.64        | 84.69 ± 0.98  | 64.61 ± 3.41  | 87.27 ± 1.09  | 81.08 ± 1.38        | 49.06 ± 2.27        |

| SNMF       |              |              |              |                     |                     | SPCA          |              |               |                     |                     |
|------------|--------------|--------------|--------------|---------------------|---------------------|---------------|--------------|---------------|---------------------|---------------------|
| SNMF-F1    |              |              |              |                     |                     | SPCA-F1       |              |               |                     |                     |
| Method     | Accuracy     | Sensitivity  | Specificity  | AUC                 | F1-Score            | Accuracy      | Sensitivity  | Specificity   | AUC                 | F1-Score            |
| SVM-RBF    | 84.90 ± 2.92 | 80.38 ± 5.88 | 85.49 ± 3.13 | 90.03 ± 2.40        | 55.16 ± 5.52        | 87.55 ± 11.01 | 85.76 ± 4.92 | 87.78 ± 12.73 | 92.35 ± 1.05        | 63.39 ± 6.73        |
| SVM-Linear | 86.65 ± 1.48 | 81.37 ± 3.49 | 87.33 ± 1.96 | 91.46 ± 0.83        | 58.28 ± 2.49        | 89.16 ± 0.61  | 86.58 ± 2.20 | 89.50 ± 0.78  | 92.23 ± 0.99        | <b>64.58 ± 1.37</b> |
| PM         | 85.45 ± 1.30 | 82.63 ± 2.53 | 85.81 ± 1.57 | 88.84 ± 1.17        | 56.51 ± 2.19        | 86.49 ± 0.94  | 78.86 ± 3.05 | 87.48 ± 1.06  | 90.06 ± 1.04        | 57.14 ± 2.11        |
| LR-L1      | 86.44 ± 0.66 | 81.05 ± 2.37 | 87.13 ± 0.71 | 88.75 ± 1.43        | 57.69 ± 1.55        | 86.51 ± 0.85  | 85.57 ± 1.80 | 86.63 ± 0.98  | 90.54 ± 0.97        | 59.16 ± 1.69        |
| LR-L2      | 81.39 ± 1.10 | 76.32 ± 4.37 | 82.04 ± 1.30 | 85.82 ± 1.14        | 48.33 ± 2.15        | 89.70 ± 0.51  | 81.96 ± 2.35 | 90.70 ± 0.56  | 92.30 ± 0.78        | 64.48 ± 1.48        |
| RF         | 85.81 ± 1.73 | 87.01 ± 3.06 | 85.66 ± 2.13 | 92.61 ± 0.78        | 58.45 ± 2.82        | 87.93 ± 1.45  | 83.61 ± 3.38 | 88.49 ± 1.89  | 91.80 ± 0.87        | 61.37 ± 2.55        |
| Adaboost   | 85.95 ± 1.70 | 89.94 ± 2.08 | 85.44 ± 2.03 | 92.98 ± 0.94        | 59.48 ± 2.71        | 86.90 ± 1.09  | 88.02 ± 2.04 | 86.75 ± 1.19  | 92.50 ± 0.96        | 60.56 ± 2.17        |
| GBT        | 88.32 ± 1.11 | 88.14 ± 2.46 | 88.34 ± 1.36 | <b>93.50 ± 0.82</b> | <b>63.32 ± 2.18</b> | 88.37 ± 1.38  | 86.82 ± 2.66 | 88.57 ± 1.78  | <b>92.94 ± 0.72</b> | 63.12 ± 2.46        |

Table 6. Comparing the performance of DA and various machine learning techniques and the dimension reduction stage for SM and F1-F3.

| Method     | F1           |              |              |                     |                     | F2           |              |              |                     |                     | F3           |              |              |                     |                     |
|------------|--------------|--------------|--------------|---------------------|---------------------|--------------|--------------|--------------|---------------------|---------------------|--------------|--------------|--------------|---------------------|---------------------|
|            | Accuracy     | Sensitivity  | Specificity  | AUC                 | F1-Score            | Accuracy     | Sensitivity  | Specificity  | AUC                 | F1-Score            | Accuracy     | Sensitivity  | Specificity  | AUC                 | F1-Score            |
| DA         | 93.41 ± 0.62 | 82.80 ± 1.90 | 97.19 ± 0.44 | 89.99 ± 0.99        | 86.83 ± 1.29        | 93.41 ± 0.62 | 82.80 ± 1.90 | 97.19 ± 0.44 | 89.99 ± 0.99        | 86.83 ± 1.29        | 93.41 ± 0.62 | 82.80 ± 1.90 | 97.19 ± 0.44 | 89.99 ± 0.99        | 86.83 ± 1.29        |
| SVM-RBF    | 92.07 ± 0.72 | 87.20 ± 2.28 | 93.81 ± 1.27 | 95.02 ± 0.74        | 85.24 ± 1.86        | 91.30 ± 1.45 | 78.22 ± 1.39 | 95.96 ± 1.73 | <b>90.37 ± 1.11</b> | 83.60 ± 1.79        | 92.69 ± 0.98 | 82.38 ± 3.62 | 96.36 ± 1.90 | <b>93.48 ± 1.13</b> | 85.55 ± 1.69        |
| SVM-Linear | 92.27 ± 0.87 | 86.68 ± 2.44 | 94.26 ± 1.53 | 94.26 ± 0.81        | 85.49 ± 1.40        | 92.93 ± 0.59 | 79.45 ± 2.08 | 97.72 ± 0.53 | 89.01 ± 0.98        | 85.48 ± 1.30        | 93.29 ± 0.46 | 83.54 ± 1.50 | 96.75 ± 0.53 | 91.35 ± 1.06        | 86.71 ± 0.93        |
| PM         | 84.24 ± 2.63 | 81.35 ± 2.38 | 85.26 ± 4.02 | 91.17 ± 0.96        | 73.19 ± 3.19        | 93.00 ± 0.68 | 80.10 ± 1.97 | 97.59 ± 0.59 | 88.50 ± 1.23        | <b>85.72 ± 1.43</b> | 92.01 ± 0.73 | 74.74 ± 2.79 | 98.15 ± 0.45 | 88.57 ± 1.16        | 83.04 ± 1.78        |
| LR-L1      | 92.43 ± 0.64 | 86.86 ± 2.97 | 94.42 ± 1.42 | 94.67 ± 0.72        | <b>85.76 ± 1.07</b> | 92.81 ± 0.52 | 78.46 ± 1.99 | 97.92 ± 0.41 | 89.09 ± 0.90        | 85.13 ± 1.19        | 93.37 ± 0.66 | 81.54 ± 1.93 | 97.58 ± 0.63 | 91.84 ± 1.18        | 86.58 ± 1.36        |
| LR-L2      | 92.24 ± 0.77 | 87.40 ± 1.98 | 94.15 ± 1.23 | <b>95.15 ± 0.56</b> | 85.76 ± 1.28        | 92.89 ± 0.56 | 78.92 ± 1.91 | 97.86 ± 0.46 | 89.75 ± 0.82        | 85.33 ± 1.24        | 93.41 ± 0.49 | 81.64 ± 1.70 | 97.60 ± 4.35 | 92.31 ± 0.83        | 86.66 ± 1.06        |
| RF         | 91.24 ± 1.14 | 87.69 ± 2.44 | 92.50 ± 2.03 | 94.86 ± 0.60        | 84.04 ± 1.63        | 92.99 ± 0.58 | 79.73 ± 2.15 | 97.71 ± 0.58 | 89.67 ± 1.06        | 85.64 ± 1.28        | 93.61 ± 0.58 | 83.03 ± 1.72 | 97.61 ± 0.50 | 92.08 ± 0.92        | <b>87.21 ± 1.19</b> |
| Adaboost   | 91.80 ± 0.70 | 86.89 ± 1.97 | 93.55 ± 0.69 | 93.26 ± 0.95        | 84.76 ± 1.33        | 90.94 ± 1.21 | 68.18 ± 2.42 | 99.03 ± 0.45 | 87.40 ± 1.07        | 79.67 ± 3.38        | 92.82 ± 0.76 | 76.88 ± 2.44 | 98.49 ± 0.40 | 88.53 ± 1.19        | 84.87 ± 1.74        |
| GBT        | 91.90 ± 0.82 | 87.90 ± 1.69 | 93.28 ± 1.21 | 94.15 ± 0.81        | 85.08 ± 1.31        | 92.82 ± 0.60 | 78.10 ± 2.01 | 98.06 ± 0.39 | 89.53 ± 0.99        | 85.08 ± 1.35        | 93.38 ± 0.61 | 80.03 ± 2.21 | 98.13 ± 0.45 | 91.59 ± 0.94        | 86.37 ± 1.38        |

| SNMF       |              |              |              |                     |                     | SPCA         |              |              |                     |                     |
|------------|--------------|--------------|--------------|---------------------|---------------------|--------------|--------------|--------------|---------------------|---------------------|
| SNMF-F1    |              |              |              |                     |                     | SPCA-F1      |              |              |                     |                     |
| Method     | Accuracy     | Sensitivity  | Specificity  | AUC                 | F1-Score            | Accuracy     | Sensitivity  | Specificity  | AUC                 | F1-Score            |
| SVM-RBF    | 88.00 ± 3.29 | 79.75 ± 1.72 | 90.93 ± 2.15 | 92.13 ± 1.73        | 77.26 ± 2.58        | 92.15 ± 0.70 | 85.24 ± 2.97 | 94.61 ± 0.94 | 94.22 ± 0.94        | 85.06 ± 1.46        |
| SVM-Linear | 89.73 ± 0.92 | 82.99 ± 2.43 | 92.12 ± 1.06 | 93.20 ± 1.01        | 80.91 ± 1.68        | 92.33 ± 0.61 | 86.11 ± 1.31 | 94.54 ± 0.73 | 94.28 ± 0.59        | <b>85.48 ± 1.08</b> |
| PM         | 85.11 ± 1.06 | 82.95 ± 1.98 | 85.87 ± 1.62 | 90.32 ± 0.72        | 74.52 ± 1.40        | 75.11 ± 1.11 | 74.88 ± 2.32 | 75.19 ± 1.17 | 85.38 ± 1.21        | 61.21 ± 1.63        |
| LR-L1      | 90.01 ± 0.76 | 82.27 ± 1.96 | 92.76 ± 0.76 | 91.40 ± 0.91        | 81.20 ± 1.44        | 91.79 ± 0.71 | 86.32 ± 1.94 | 93.74 ± 0.80 | 93.38 ± 0.80        | 84.66 ± 1.32        |
| LR-L2      | 80.34 ± 2.45 | 66.09 ± 7.35 | 85.41 ± 5.64 | 86.45 ± 1.15        | 63.84 ± 1.91        | 91.95 ± 0.63 | 81.37 ± 1.82 | 95.72 ± 0.65 | 93.20 ± 0.78        | 84.14 ± 1.25        |
| RF         | 89.76 ± 1.10 | 87.73 ± 2.48 | 90.49 ± 1.85 | 94.66 ± 0.60        | 81.83 ± 1.58        | 91.64 ± 0.73 | 85.42 ± 2.23 | 93.84 ± 1.30 | 94.28 ± 0.68        | 84.28 ± 1.20        |
| Adaboost   | 91.10 ± 0.83 | 88.25 ± 1.86 | 92.11 ± 1.04 | 94.63 ± 0.68        | 83.88 ± 1.42        | 91.23 ± 0.71 | 88.05 ± 1.70 | 92.36 ± 0.83 | 94.28 ± 0.83        | 84.04 ± 1.22        |
| GBT        | 91.66 ± 0.80 | 87.45 ± 2.14 | 93.16 ± 1.40 | <b>95.09 ± 0.61</b> | <b>84.63 ± 1.25</b> | 92.02 ± 0.66 | 87.04 ± 1.69 | 93.80 ± 0.96 | <b>94.45 ± 0.81</b> | 85.13 ± 1.13        |

Table 7. Comparing the performance of DA and various machine learning techniques and the dimension reduction stage for AK and F1-F3.

| Method     | F1           |               |               |                     |                      | F2           |              |              |                     |                     | F3            |               |               |                     |                     |
|------------|--------------|---------------|---------------|---------------------|----------------------|--------------|--------------|--------------|---------------------|---------------------|---------------|---------------|---------------|---------------------|---------------------|
|            | Accuracy     | Sensitivity   | Specificity   | AUC                 | F1-Score             | Accuracy     | Sensitivity  | Specificity  | AUC                 | F1-Score            | Accuracy      | Sensitivity   | Specificity   | AUC                 | F1-Score            |
| DA         | 96.52 ± 0.59 | 65.21 ± 5.32  | 97.19 ± 0.44  | 82.46 ± 2.70        | 77.46 ± 4.25         | 96.52 ± 0.59 | 65.21 ± 5.32 | 97.19 ± 0.44 | 82.46 ± 2.70        | 77.46 ± 4.25        | 96.52 ± 0.59  | 65.21 ± 5.32  | 97.19 ± 0.44  | 82.46 ± 2.70        | 77.46 ± 4.25        |
| SVM-RBF    | 87.09 ± 5.57 | 78.53 ± 7.97  | 87.96 ± 6.74  | 90.23 ± 3.01        | 55.33 ± 10.66        | 63.32 ± 2.34 | 77.47 ± 8.24 | 61.87 ± 2.34 | 62.56 ± 2.41        | 53.94 ± 5.17        | 96.02 ± 1.35  | 65.27 ± 6.55  | 99.14 ± 1.41  | 88.41 ± 4.10        | <b>75.32 ± 6.13</b> |
| SVM-Linear | 86.16 ± 4.50 | 77.36 ± 7.84  | 87.06 ± 5.55  | 89.20 ± 2.38        | 52.06 ± 7.54         | 96.53 ± 0.47 | 64.84 ± 5.21 | 99.75 ± 0.20 | 82.26 ± 2.61        | 77.40 ± 3.75        | 94.02 ± 3.41  | 67.18 ± 5.91  | 96.74 ± 3.95  | 84.94 ± 4.68        | 69.33 ± 10.54       |
| PM         | 71.30 ± 6.48 | 87.94 ± 5.12  | 69.61 ± 7.42  | 88.18 ± 2.49        | 36.77 ± 4.72         | 96.54 ± 0.54 | 64.83 ± 4.84 | 99.75 ± 0.22 | 82.13 ± 2.43        | 77.44 ± 4.00        | 87.53 ± 12.64 | 72.62 ± 12.05 | 89.04 ± 14.97 | 89.02 ± 2.12        | 61.36 ± 18.03       |
| LR-L1      | 91.64 ± 5.90 | 71.49 ± 10.78 | 93.69 ± 7.27  | 91.00 ± 2.94        | <b>65.12 ± 12.82</b> | 96.59 ± 0.56 | 64.82 ± 5.79 | 99.81 ± 0.14 | 82.32 ± 2.91        | <b>77.66 ± 3.38</b> | 92.96 ± 7.35  | 68.51 ± 8.81  | 95.44 ± 8.70  | <b>89.85 ± 3.04</b> | 69.72 ± 14.44       |
| LR-L2      | 90.48 ± 6.15 | 73.51 ± 9.09  | 92.20 ± 7.53  | <b>91.22 ± 2.35</b> | 62.71 ± 12.90        | 96.52 ± 0.62 | 64.84 ± 5.86 | 99.73 ± 0.23 | 82.26 ± 2.94        | 77.30 ± 4.55        | 95.25 ± 4.60  | 67.19 ± 6.84  | 98.10 ± 5.42  | 89.73 ± 2.83        | 74.80 ± 9.70        |
| RF         | 84.19 ± 5.30 | 80.09 ± 8.38  | 84.61 ± 6.50  | 89.93 ± 2.24        | 49.69 ± 7.11         | 96.52 ± 0.61 | 64.84 ± 6.00 | 99.74 ± 1.86 | 82.29 ± 3.01        | 77.33 ± 4.59        | 95.50 ± 3.68  | 65.54 ± 6.55  | 98.60 ± 4.23  | 89.24 ± 3.21        | 74.64 ± 8.58        |
| Adaboost   | 78.31 ± 2.30 | 78.33 ± 14.43 | 78.31 ± 26.45 | 90.42 ± 2.59        | 51.96 ± 20.20        | 96.57 ± 0.54 | 64.84 ± 5.53 | 99.79 ± 1.73 | <b>82.32 ± 2.76</b> | 77.58 ± 4.17        | 94.49 ± 5.77  | 61.72 ± 10.96 | 97.81 ± 7.01  | 89.62 ± 2.44        | 70.72 ± 11.01       |
| GBT        | 93.94 ± 4.93 | 73.82 ± 7.72  | 92.68 ± 5.97  | 90.57 ± 2.67        | 62.70 ± 11.21        | 96.51 ± 0.60 | 64.84 ± 5.89 | 99.72 ± 0.23 | 82.24 ± 2.94        | 77.25 ± 4.69        | 96.07 ± 1.17  | 61.86 ± 9.66  | 99.55 ± 1.03  | 89.46 ± 2.46        | 74.05 ± 8.90        |

| Method     | SNMF          |               |               |                     |                     | SPCA          |               |               |                     |                     |
|------------|---------------|---------------|---------------|---------------------|---------------------|---------------|---------------|---------------|---------------------|---------------------|
|            | SNMF-F1       |               |               |                     |                     | SPCA-F1       |               |               |                     |                     |
|            | Accuracy      | Sensitivity   | Specificity   | AUC                 | F1-Score            | Accuracy      | Sensitivity   | Specificity   | AUC                 | F1-Score            |
| SVM-RBF    | 75.88 ± 10.57 | 73.96 ± 9.60  | 76.07 ± 12.14 | 82.80 ± 8.80        | 37.36 ± 5.90        | 45.61 ± 11.15 | 86.45 ± 16.46 | 41.46 ± 16.90 | 49.82 ± 13.30       | 37.39 ± 13.98       |
| SVM-Linear | 80.40 ± 4.09  | 73.59 ± 1.22  | 81.10 ± 5.14  | 84.60 ± 2.99        | 40.90 ± 6.10        | 86.74 ± 21.68 | 72.50 ± 11.25 | 88.18 ± 24.83 | 88.67 ± 12.95       | 63.61 ± 16.42       |
| PM         | 79.02 ± 3.69  | 79.31 ± 5.62  | 79.96 ± 4.36  | 86.77 ± 2.08        | 42.51 ± 4.08        | 85.22 ± 4.25  | 80.00 ± 7.57  | 85.75 ± 5.09  | 90.50 ± 2.58        | 50.96 ± 7.01        |
| LR-L1      | 82.48 ± 6.73  | 68.42 ± 9.13  | 83.91 ± 8.09  | 83.94 ± 3.00        | 43.80 ± 8.11        | 96.59 ± 0.58  | 64.83 ± 5.77  | 99.81 ± 0.16  | 82.32 ± 2.91        | <b>77.66 ± 4.44</b> |
| LR-L2      | 73.40 ± 4.53  | 71.38 ± 11.05 | 73.60 ± 5.86  | 80.26 ± 2.80        | 33.24 ± 3.11        | 88.68 ± 2.48  | 77.23 ± 6.96  | 89.84 ± 3.05  | <b>91.37 ± 2.36</b> | 56.14 ± 5.03        |
| RF         | 90.79 ± 4.23  | 73.42 ± 8.25  | 92.55 ± 5.22  | <b>90.21 ± 2.55</b> | <b>61.33 ± 9.04</b> | 90.87 ± 4.37  | 73.01 ± 8.28  | 90.63 ± 2.46  | 90.63 ± 2.46        | 61.52 ± 9.67        |
| Adaboost   | 81.75 ± 2.48  | 80.04 ± 4.85  | 81.92 ± 2.89  | 88.51 ± 2.72        | 44.90 ± 3.36        | 90.53 ± 6.99  | 72.70 ± 1.03  | 92.35 ± 8.58  | 90.25 ± 2.72        | 63.26 ± 13.56       |
| GBT        | 90.63 ± 4.40  | 71.89 ± 8.07  | 92.53 ± 5.47  | 89.52 ± 2.78        | 60.60 ± 9.33        | 90.83 ± 5.05  | 73.40 ± 8.07  | 92.60 ± 6.13  | 90.94 ± 2.45        | 62.41 ± 11.35       |



Table 8. Comparing the performance of DA and various machine learning techniques and the dimension reduction stage for MOX and F1-F3.

| Method     | F1           |               |               |                     |                     | F2            |               |               |                     |                     | F3            |               |               |                     |                     |
|------------|--------------|---------------|---------------|---------------------|---------------------|---------------|---------------|---------------|---------------------|---------------------|---------------|---------------|---------------|---------------------|---------------------|
|            | Accuracy     | Sensitivity   | Specificity   | AUC                 | F1-Score            | Accuracy      | Sensitivity   | Specificity   | AUC                 | F1-Score            | Accuracy      | Sensitivity   | Specificity   | AUC                 | F1-Score            |
| DA         | 92.59 ± 1.28 | 62.97 ± 6.60  | 98.80 ± 0.68  | 80.89 ± 3.32        | 74.49 ± 5.09        | 92.59 ± 1.28  | 62.97 ± 6.60  | 98.80 ± 0.68  | 80.89 ± 3.32        | 74.49 ± 5.09        | 92.59 ± 1.28  | 62.97 ± 6.60  | 98.80 ± 0.68  | 80.89 ± 3.32        | 74.49 ± 5.09        |
| SVM-RBF    | 82.08 ± 5.32 | 78.12 ± 9.72  | 82.91 ± 7.75  | 87.69 ± 3.05        | 60.90 ± 6.14        | 83.57 ± 14.48 | 67.38 ± 13.16 | 86.97 ± 12.12 | 75.33 ± 17.32       | 69.16 ± 15.11       | 72.29 ± 13.57 | 75.94 ± 14.98 | 71.51 ± 19.99 | 70.55 ± 17.69       | 62.24 ± 19.94       |
| SVM-Linear | 83.94 ± 4.81 | 76.83 ± 7.79  | 85.55 ± 6.82  | 88.12 ± 3.17        | 63.13 ± 6.22        | 92.56 ± 0.94  | 62.82 ± 4.53  | 98.80 ± 0.47  | 80.81 ± 2.33        | 74.47 ± 3.75        | 92.41 ± 1.14  | 68.43 ± 6.18  | 97.45 ± 1.36  | 84.99 ± 2.81        | 75.69 ± 3.65        |
| PM         | 64.73 ± 5.20 | 87.89 ± 5.16  | 59.86 ± 6.72  | 83.80 ± 3.18        | 46.60 ± 3.58        | 85.01 ± 22.61 | 66.34 ± 12.91 | 88.94 ± 29.65 | 80.85 ± 3.27        | 69.76 ± 14.38       | 89.34 ± 14.00 | 70.23 ± 8.09  | 93.35 ± 8.09  | 85.02 ± 2.16        | 74.28 ± 10.72       |
| LR-L1      | 85.29 ± 5.55 | 74.39 ± 10.15 | 87.57 ± 8.17  | 89.49 ± 2.42        | 64.66 ± 6.73        | 92.48 ± 1.30  | 62.39 ± 6.44  | 98.80 ± 0.55  | 80.72 ± 3.44        | 74.06 ± 5.29        | 92.84 ± 1.13  | 65.58 ± 6.94  | 98.56 ± 0.71  | 83.41 ± 3.33        | 75.86 ± 4.76        |
| LR-L2      | 81.12 ± 6.45 | 80.08 ± 9.26  | 81.35 ± 9.29  | 89.55 ± 2.84        | 60.66 ± 6.79        | 92.51 ± 1.19  | 62.53 ± 6.22  | 98.80 ± 0.48  | 80.88 ± 3.05        | 74.17 ± 4.94        | 92.58 ± 1.54  | 67.63 ± 5.14  | 97.81 ± 1.58  | <b>85.56 ± 2.56</b> | <b>75.98 ± 4.50</b> |
| RF         | 78.10 ± 5.10 | 79.94 ± 7.74  | 77.72 ± 7.10  | 86.86 ± 2.74        | 56.37 ± 5.09        | 92.59 ± 1.02  | 62.98 ± 5.48  | 98.80 ± 0.51  | <b>80.88 ± 2.72</b> | <b>74.55 ± 4.15</b> | 92.26 ± 1.52  | 64.45 ± 9.27  | 98.60 ± 4.23  | 85.37 ± 3.14        | 73.95 ± 6.38        |
| Adaboost   | 58.20 ± 9.60 | 90.58 ± 4.56  | 51.41 ± 12.02 | 87.26 ± 3.11        | 43.42 ± 4.22        | 84.79 ± 22.53 | 65.20 ± 13.40 | 88.90 ± 29.64 | 80.09 ± 3.33        | 68.82 ± 14.15       | 90.37 ± 9.83  | 58.44 ± 9.87  | 97.81 ± 7.01  | 81.11 ± 2.83        | 69.65 ± 9.33        |
| GBT        | 85.39 ± 5.69 | 76.84 ± 9.29  | 87.19 ± 8.21  | <b>90.27 ± 2.96</b> | <b>65.69 ± 7.01</b> | 92.59 ± 1.05  | 62.97 ± 5.27  | 98.80 ± 0.60  | 80.85 ± 2.64        | 74.55 ± 4.19        | 92.67 ± 1.11  | 64.95 ± 6.74  | 99.55 ± 1.03  | 84.86 ± 2.73        | 75.18 ± 4.48        |

| SNMF       |              |               |               |                     |                     | SPCA          |               |               |                     |                     |
|------------|--------------|---------------|---------------|---------------------|---------------------|---------------|---------------|---------------|---------------------|---------------------|
| SNMF-F1    |              |               |               |                     |                     | SPCA-F1       |               |               |                     |                     |
| Method     | Accuracy     | Sensitivity   | Specificity   | AUC                 | F1-Score            | Accuracy      | Sensitivity   | Specificity   | AUC                 | F1-Score            |
| SVM-RBF    | 69.04 ± 9.09 | 73.92 ± 9.68  | 68.02 ± 12.12 | 78.75 ± 7.90        | 45.90 ± 4.97        | 69.19 ± 12.18 | 80.95 ± 13.02 | 66.72 ± 17.64 | 74.62 ± 18.94       | 56.39 ± 16.13       |
| SVM-Linear | 75.20 ± 4.37 | 70.14 ± 8.67  | 76.25 ± 6.41  | 81.88 ± 2.77        | 49.70 ± 3.87        | 87.37 ± 4.23  | 71.01 ± 9.19  | 90.80 ± 6.27  | 88.73 ± 2.48        | 66.74 ± 6.17        |
| PM         | 67.75 ± 5.14 | 75.99 ± 7.19  | 66.02 ± 6.83  | 78.62 ± 3.70        | 45.23 ± 4.21        | 66.07 ± 3.65  | 75.18 ± 8.38  | 64.15 ± 5.13  | 76.93 ± 3.56        | 43.47 ± 3.38        |
| LR-L1      | 71.32 ± 7.47 | 66.84 ± 11.58 | 72.26 ± 11.03 | 78.41 ± 3.63        | 45.28 ± 4.44        | 91.69 ± 1.23  | 98.92 ± 0.63  | 91.85 ± 4.59  | 80.84 ± 3.05        | <b>70.30 ± 5.36</b> |
| LR-L2      | 66.00 ± 3.00 | 69.39 ± 7.15  | 65.29 ± 3.61  | 75.16 ± 3.43        | 41.46 ± 3.62        | 81.08 ± 3.72  | 80.27 ± 5.97  | 81.25 ± 4.87  | 88.68 ± 2.46        | 59.84 ± 4.83        |
| RF         | 80.97 ± 4.32 | 73.55 ± 10.49 | 82.53 ± 6.65  | 85.73 ± 2.97        | 57.63 ± 5.06        | 84.52 ± 3.75  | 69.76 ± 9.62  | 87.62 ± 5.98  | 87.73 ± 2.57        | 61.35 ± 4.71        |
| Adaboost   | 73.41 ± 4.42 | 82.02 ± 6.17  | 71.60 ± 5.99  | 86.08 ± 2.45        | 51.94 ± 3.70        | 75.23 ± 9.06  | 80.91 ± 10.38 | 74.03 ± 12.72 | 87.78 ± 3.10        | 54.56 ± 7.16        |
| GBT        | 83.14 ± 4.17 | 73.41 ± 7.95  | 85.18 ± 6.03  | <b>88.07 ± 2.71</b> | <b>60.63 ± 5.32</b> | 87.39 ± 2.93  | 71.35 ± 7.55  | 90.76 ± 3.97  | <b>88.78 ± 3.29</b> | 66.49 ± 5.64        |

Table 9. Comparing the performance of DA and various machine learning techniques and the dimension reduction stage for OFX and F1-F3.

| Method     | F1            |              |               |                     |                     | F2            |               |               |                     |                     | F3            |               |               |                     |                     |
|------------|---------------|--------------|---------------|---------------------|---------------------|---------------|---------------|---------------|---------------------|---------------------|---------------|---------------|---------------|---------------------|---------------------|
|            | Accuracy      | Sensitivity  | Specificity   | AUC                 | F1-Score            | Accuracy      | Sensitivity   | Specificity   | AUC                 | F1-Score            | Accuracy      | Sensitivity   | Specificity   | AUC                 | F1-Score            |
| DA         | 94.21 ± 0.66  | 65.07 ± 3.92 | 99.31 ± 0.28  | 82.19 ± 1.98        | 76.95 ± 3.04        | 94.21 ± 0.66  | 65.07 ± 3.92  | 99.31 ± 0.28  | 82.19 ± 1.98        | 76.95 ± 3.04        | 94.21 ± 0.66  | 65.07 ± 3.92  | 99.31 ± 0.28  | 82.19 ± 1.98        | 76.95 ± 3.04        |
| SVM-RBF    | 84.38 ± 3.47  | 81.83 ± 5.43 | 84.82 ± 4.74  | 90.64 ± 1.83        | 61.41 ± 4.63        | 78.31 ± 11.72 | 71.73 ± 14.69 | 79.46 ± 19.73 | 71.74 ± 13.01       | 66.52 ± 10.56       | 92.89 ± 11.19 | 71.92 ± 6.49  | 96.55 ± 13.83 | 85.31 ± 10.26       | 78.27 ± 8.42        |
| SVM-Linear | 86.89 ± 3.52  | 79.34 ± 6.10 | 88.20 ± 4.83  | 90.52 ± 2.19        | 64.92 ± 5.35        | 94.21 ± 0.73  | 65.07 ± 3.92  | 99.31 ± 0.37  | 82.18 ± 2.01        | 76.95 ± 3.23        | 94.55 ± 0.77  | 72.64 ± 4.42  | 98.39 ± 0.81  | 88.14 ± 1.90        | 79.86 ± 3.00        |
| PM         | 73.61 ± 3.71  | 85.80 ± 3.09 | 71.48 ± 4.49  | 86.97 ± 2.12        | 49.43 ± 3.53        | 91.01 ± 15.55 | 66.29 ± 8.00  | 95.34 ± 19.46 | 82.20 ± 2.05        | 74.76 ± 1.04        | 94.26 ± 1.21  | 70.85 ± 4.35  | 98.35 ± 1.34  | 87.04 ± 2.26        | 78.66 ± 3.94        |
| LR-L1      | 95.03 ± 0.67  | 71.70 ± 6.70 | 90.74 ± 5.33  | 92.10 ± 1.71        | 69.12 ± 6.65        | 94.21 ± 0.77  | 65.02 ± 4.86  | 99.31 ± 0.34  | 82.21 ± 2.43        | 76.88 ± 3.64        | 95.03 ± 0.67  | 71.70 ± 3.89  | 99.11 ± 0.41  | 87.92 ± 1.60        | <b>81.06 ± 2.83</b> |
| LR-L2      | 86.48 ± 4.56  | 79.04 ± 7.74 | 87.78 ± 6.43  | 91.81 ± 1.63        | 64.52 ± 6.57        | 94.21 ± 0.88  | 65.06 ± 5.01  | 99.31 ± 0.36  | 82.22 ± 2.57        | 76.90 ± 4.06        | 94.79 ± 0.71  | 72.18 ± 3.68  | 98.75 ± 0.53  | 88.50 ± 1.59        | 80.47 ± 2.78        |
| RF         | 81.31 ± 4.07  | 81.54 ± 7.67 | 81.27 ± 5.82  | 90.00 ± 1.65        | 56.99 ± 4.28        | 94.21 ± 0.70  | 65.07 ± 4.76  | 99.31 ± 0.32  | <b>82.22 ± 2.33</b> | <b>76.91 ± 3.32</b> | 94.61 ± 0.78  | 70.96 ± 4.57  | 98.75 ± 0.58  | <b>88.58 ± 1.86</b> | 79.62 ± 3.19        |
| Adaboost   | 65.08 ± 13.03 | 91.40 ± 5.72 | 60.48 ± 16.04 | 90.11 ± 1.90        | 45.55 ± 8.34        | 87.76 ± 21.49 | 67.12 ± 10.69 | 91.36 ± 26.94 | 82.00 ± 2.45        | 72.29 ± 14.10       | 87.76 ± 21.49 | 67.12 ± 10.07 | 99.35 ± 0.34  | 82.00 ± 2.45        | 72.29 ± 14.09       |
| GBT        | 89.12 ± 4.62  | 79.06 ± 6.94 | 90.88 ± 6.38  | <b>92.33 ± 1.49</b> | <b>69.63 ± 7.20</b> | 94.21 ± 0.68  | 65.06 ± 4.28  | 99.31 ± 0.29  | 82.18 ± 2.33        | 76.91 ± 3.40        | 94.81 ± 0.71  | 70.20 ± 4.35  | 99.11 ± 0.41  | 88.12 ± 2.00        | 80.04 ± 3.08        |

| Method     | SNMF         |              |              |                     |                     | SPCA          |               |               |                     |                     |
|------------|--------------|--------------|--------------|---------------------|---------------------|---------------|---------------|---------------|---------------------|---------------------|
|            | SNMF-F1      |              |              |                     |                     | SPCA-F1       |               |               |                     |                     |
|            | Accuracy     | Sensitivity  | Specificity  | AUC                 | F1-Score            | Accuracy      | Sensitivity   | Specificity   | AUC                 | F1-Score            |
| SVM-RBF    | 66.87 ± 5.77 | 66.92 ± 6.92 | 66.86 ± 7.18 | 76.58 ± 3.80        | 37.95 ± 4.52        | 85.84 ± 18.26 | 73.63 ± 11.38 | 87.98 ± 22.81 | 87.97 ± 14.01       | 67.09 ± 12.38       |
| SVM-Linear | 72.04 ± 3.57 | 68.22 ± 5.27 | 72.70 ± 4.55 | 79.65 ± 2.08        | 42.24 ± 3.11        | 92.05 ± 2.46  | 70.96 ± 6.78  | 95.74 ± 3.51  | 91.21 ± 1.90        | 73.08 ± 5.22        |
| PM         | 70.14 ± 2.02 | 83.81 ± 4.23 | 67.75 ± 2.46 | 82.72 ± 2.09        | 45.56 ± 2.19        | 58.83 ± 4.02  | 82.65 ± 4.78  | 54.66 ± 5.01  | 78.93 ± 2.88        | 37.55 ± 2.79        |
| LR-L1      | 62.54 ± 3.53 | 65.24 ± 7.13 | 62.07 ± 4.82 | 68.94 ± 3.01        | 34.16 ± 2.45        | 94.23 ± 0.81  | 65.38 ± 4.30  | 99.28 ± 5.48  | 87.43 ± 3.52        | <b>77.08 ± 3.42</b> |
| LR-L2      | 62.66 ± 2.81 | 68.41 ± 4.44 | 61.66 ± 3.55 | 72.25 ± 2.34        | 35.34 ± 2.02        | 86.94 ± 1.79  | 79.04 ± 4.23  | 88.33 ± 2.28  | 90.84 ± 1.54        | 64.44 ± 3.31        |
| RF         | 84.40 ± 3.56 | 75.82 ± 9.08 | 85.89 ± 5.32 | 90.50 ± 1.76        | 59.55 ± 4.36        | 86.83 ± 3.05  | 75.22 ± 7.67  | 88.86 ± 4.54  | 90.47 ± 2.02        | 63.38 ± 4.45        |
| Adaboost   | 78.24 ± 3.72 | 84.30 ± 4.60 | 77.18 ± 4.73 | 90.16 ± 1.91        | 53.89 ± 4.12        | 82.27 ± 10.25 | 79.91 ± 10.15 | 82.68 ± 13.63 | 90.93 ± 2.06        | 60.63 ± 11.12       |
| GBT        | 87.09 ± 3.42 | 75.45 ± 6.17 | 89.13 ± 4.70 | <b>91.15 ± 1.61</b> | <b>64.13 ± 5.77</b> | 91.06 ± 2.64  | 72.70 ± 6.16  | 94.27 ± 3.78  | <b>91.61 ± 1.82</b> | 71.25 ± 5.06        |

Table 10. Comparing the performance of DA and various machine learning techniques and the dimension reduction stage for KAN and F1-F3.

| Method     | F1            |              |              |                     |                     | F2            |               |               |                     |                     | F3            |              |               |                     |                     |
|------------|---------------|--------------|--------------|---------------------|---------------------|---------------|---------------|---------------|---------------------|---------------------|---------------|--------------|---------------|---------------------|---------------------|
|            | Accuracy      | Sensitivity  | Specificity  | AUC                 | F1-Score            | Accuracy      | Sensitivity   | Specificity   | AUC                 | F1-Score            | Accuracy      | Sensitivity  | Specificity   | AUC                 | F1-Score            |
| DA         | 94.79 ± 0.77  | 72.31 ± 5.40 | 97.61 ± 0.65 | 84.96 ± 2.68        | 75.54 ± 3.82        | 94.79 ± 0.77  | 72.31 ± 5.40  | 97.61 ± 0.65  | 84.96 ± 2.68        | 75.54 ± 3.82        | 94.79 ± 0.77  | 72.31 ± 5.40 | 97.61 ± 0.65  | 84.96 ± 2.68        | 75.54 ± 3.82        |
| SVM-RBF    | 91.50 ± 3.35  | 80.11 ± 5.94 | 92.92 ± 4.19 | 91.50 ± 2.44        | 68.96 ± 8.27        | 52.98 ± 11.82 | 86.10 ± 14.39 | 48.81 ± 14.67 | 53.33 ± 34.53       | 47.83 ± 17.94       | 94.61 ± 2.09  | 77.16 ± 6.27 | 96.81 ± 2.37  | 89.82 ± 3.02        | 76.61 ± 6.53        |
| SVM-Linear | 90.50 ± 3.82  | 82.15 ± 6.13 | 91.55 ± 4.64 | 91.85 ± 2.38        | 67.08 ± 8.31        | 94.79 ± 0.77  | 72.32 ± 4.96  | 97.61 ± 0.63  | 81.16 ± 2.58        | 75.57 ± 3.71        | 95.57 ± 1.28  | 78.77 ± 4.46 | 97.69 ± 1.55  | 90.16 ± 2.88        | 80.11 ± 4.63        |
| PM         | 84.76 ± 2.84  | 82.83 ± 6.05 | 85.00 ± 3.32 | 89.38 ± 3.41        | 55.15 ± 5.07        | 94.78 ± 0.99  | 71.53 ± 7.64  | 97.70 ± 0.85  | 85.64 ± 3.09        | 75.21 ± 5.48        | 89.21 ± 14.19 | 77.87 ± 8.30 | 90.63 ± 16.47 | 87.94 ± 3.91        | 68.52 ± 14.71       |
| LR-L1      | 94.43 ± 2.18  | 77.89 ± 6.37 | 96.52 ± 2.81 | 91.96 ± 2.67        | 76.41 ± 6.45        | 94.76 ± 0.85  | 71.95 ± 5.28  | 97.63 ± 0.72  | 85.53 ± 2.71        | 75.37 ± 4.02        | 96.38 ± 1.96  | 77.26 ± 6.22 | 98.78 ± 2.17  | 90.01 ± 3.17        | 82.98 ± 6.01        |
| LR-L2      | 92.05 ± 4.10  | 80.41 ± 6.48 | 93.48 ± 4.93 | <b>92.49 ± 2.93</b> | 70.86 ± 9.95        | 94.77 ± 0.76  | 71.94 ± 5.28  | 97.64 ± 0.71  | 85.62 ± 2.15        | 75.44 ± 3.50        | 94.22 ± 2.54  | 77.30 ± 6.69 | 96.34 ± 3.20  | <b>90.87 ± 2.96</b> | 75.73 ± 7.24        |
| RF         | 88.82 ± 5.10  | 80.41 ± 7.20 | 89.88 ± 6.19 | 91.32 ± 2.54        | 63.28 ± 8.78        | 95.38 ± 1.03  | 64.63 ± 7.53  | 99.24 ± 0.80  | 85.57 ± 3.28        | 75.58 ± 5.88        | 96.05 ± 1.28  | 76.37 ± 5.11 | 98.53 ± 1.31  | 90.64 ± 2.63        | 81.36 ± 5.17        |
| Adaboost   | 69.99 ± 15.91 | 87.11 ± 5.70 | 67.84 ± 6.05 | 90.44 ± 2.31        | 41.57 ± 7.15        | 95.40 ± 0.88  | 65.70 ± 6.54  | 99.13 ± 0.80  | 85.65 ± 2.89        | 76.04 ± 4.84        | 92.50 ± 0.86  | 73.01 ± 6.36 | 99.45 ± 0.84  | 88.78 ± 2.32        | 82.25 ± 4.40        |
| GBT        | 94.95 ± 2.03  | 78.27 ± 6.80 | 97.04 ± 2.43 | 91.72 ± 2.88        | <b>78.03 ± 6.53</b> | 95.38 ± 0.78  | 65.36 ± 5.42  | 99.15 ± 0.76  | <b>85.65 ± 2.62</b> | <b>75.89 ± 4.02</b> | 96.65 ± 0.84  | 74.78 ± 6.62 | 99.40 ± 0.69  | 90.02 ± 2.86        | <b>83.20 ± 4.45</b> |

| Method     | SNMF         |              |              |                     |                     | SPCA          |              |               |                     |                     |
|------------|--------------|--------------|--------------|---------------------|---------------------|---------------|--------------|---------------|---------------------|---------------------|
|            | SNMF-F1      |              |              |                     |                     | SPCA-F1       |              |               |                     |                     |
|            | Accuracy     | Sensitivity  | Specificity  | AUC                 | F1-Score            | Accuracy      | Sensitivity  | Specificity   | AUC                 | F1-Score            |
| SVM-RBF    | 83.66 ± 4.68 | 73.51 ± 8.18 | 84.94 ± 5.47 | 86.76 ± 4.03        | 50.97 ± 7.00        | 91.05 ± 11.73 | 79.10 ± 6.81 | 92.55 ± 13.65 | 90.51 ± 6.28        | 70.35 ± 9.72        |
| SVM-Linear | 84.48 ± 3.45 | 75.52 ± 8.47 | 85.61 ± 4.66 | 88.04 ± 2.45        | 52.61 ± 4.67        | 93.53 ± 2.28  | 78.76 ± 6.71 | 95.39 ± 3.03  | 91.68 ± 2.50        | 73.76 ± 6.07        |
| PM         | 79.59 ± 3.84 | 78.19 ± 6.56 | 79.77 ± 4.75 | 86.34 ± 2.91        | 46.55 ± 4.89        | 86.14 ± 3.61  | 75.78 ± 8.26 | 87.44 ± 4.40  | 85.63 ± 3.92        | 55.57 ± 6.44        |
| LR-L1      | 75.13 ± 4.24 | 68.98 ± 8.90 | 75.90 ± 5.41 | 78.53 ± 3.41        | 38.51 ± 4.19        | 95.56 ± 0.71  | 62.72 ± 5.92 | 99.68 ± 0.26  | 85.07 ± 3.66        | <b>75.77 ± 4.65</b> |
| LR-L2      | 71.57 ± 5.47 | 74.48 ± 7.48 | 71.21 ± 6.25 | 81.17 ± 4.65        | 37.37 ± 5.18        | 93.14 ± 1.40  | 79.89 ± 5.03 | 94.81 ± 1.58  | 90.52 ± 2.53        | 72.36 ± 4.48        |
| RF         | 91.33 ± 4.05 | 79.35 ± 6.50 | 92.84 ± 4.91 | <b>91.87 ± 2.43</b> | <b>68.63 ± 9.24</b> | 92.85 ± 3.25  | 79.68 ± 7.55 | 92.84 ± 4.91  | <b>92.08 ± 2.42</b> | 72.46 ± 7.84        |
| Adaboost   | 81.74 ± 3.31 | 85.04 ± 5.28 | 81.32 ± 3.92 | 90.43 ± 2.74        | 51.35 ± 4.67        | 85.91 ± 3.93  | 84.63 ± 4.91 | 81.32 ± 3.92  | 91.65 ± 2.89        | 57.98 ± 6.43        |
| GBT        | 91.41 ± 3.60 | 77.59 ± 7.23 | 93.14 ± 4.58 | 91.01 ± 2.47        | 68.00 ± 7.61        | 93.22 ± 2.65  | 78.29 ± 6.28 | 93.14 ± 4.58  | 91.91 ± 2.04        | 72.82 ± 7.27        |

Table 11. Comparing the performance of DA and various machine learning techniques and the dimension reduction stage for CAP and F1-F3.

| Method     | F1           |               |              |                     |                     | F2           |              |              |                     |                     | F3           |              |              |                     |                     |
|------------|--------------|---------------|--------------|---------------------|---------------------|--------------|--------------|--------------|---------------------|---------------------|--------------|--------------|--------------|---------------------|---------------------|
|            | Accuracy     | Sensitivity   | Specificity  | AUC                 | F1-Score            | Accuracy     | Sensitivity  | Specificity  | AUC                 | F1-Score            | Accuracy     | Sensitivity  | Specificity  | AUC                 | F1-Score            |
| DA         | 90.35 ± 1.00 | 59.68 ± 5.84  | 93.87 ± 0.88 | 76.78 ± 2.96        | 56.00 ± 4.51        | 90.35 ± 1.00 | 59.68 ± 5.84 | 93.87 ± 0.88 | 76.78 ± 2.96        | 56.00 ± 4.51        | 90.35 ± 1.00 | 59.68 ± 5.84 | 93.87 ± 0.88 | 76.78 ± 2.96        | 56.00 ± 4.51        |
| SVM-RBF    | 84.68 ± 7.12 | 68.83 ± 9.28  | 86.50 ± 8.86 | 84.91 ± 3.01        | 50.83 ± 10.08       | 74.22 ± 1.92 | 67.30 ± 6.80 | 75.02 ± 6.67 | 69.95 ± 3.47        | 55.92 ± 5.17        | 74.74 ± 4.39 | 66.60 ± 8.92 | 75.67 ± 9.73 | 73.59 ± 5.79        | 53.81 ± 8.69        |
| SVM-Linear | 84.54 ± 6.35 | 66.83 ± 7.82  | 86.58 ± 7.57 | 82.68 ± 3.66        | 48.96 ± 8.56        | 94.52 ± 0.54 | 57.78 ± 4.69 | 98.74 ± 0.39 | 78.23 ± 2.39        | <b>68.39 ± 3.68</b> | 91.68 ± 3.35 | 60.70 ± 6.42 | 95.24 ± 3.94 | 79.40 ± 4.10        | 61.27 ± 8.71        |
| PM         | 72.81 ± 4.36 | 79.02 ± 5.80  | 72.10 ± 5.24 | 83.80 ± 2.65        | 37.74 ± 3.11        | 83.23 ± 2.83 | 62.70 ± 5.59 | 85.59 ± 6.01 | <b>78.51 ± 3.40</b> | 60.96 ± 5.70        | 78.57 ± 6.97 | 69.81 ± 6.41 | 79.58 ± 5.26 | 83.58 ± 2.30        | 47.84 ± 8.61        |
| LR-L1      | 89.62 ± 5.43 | 63.08 ± 7.95  | 92.67 ± 6.80 | 84.57 ± 3.01        | <b>58.08 ± 9.69</b> | 94.50 ± 0.67 | 57.40 ± 5.21 | 98.76 ± 0.33 | 78.03 ± 2.76        | 68.16 ± 4.51        | 92.29 ± 4.40 | 58.83 ± 7.07 | 96.13 ± 5.26 | 83.52 ± 2.62        | 62.73 ± 8.50        |
| LR-L2      | 85.57 ± 7.55 | 67.52 ± 8.61  | 87.65 ± 9.23 | <b>85.33 ± 2.56</b> | 52.38 ± 11.08       | 94.52 ± 0.73 | 57.71 ± 5.51 | 98.75 ± 0.40 | 78.02 ± 2.92        | 68.36 ± 4.79        | 91.20 ± 6.41 | 60.48 ± 8.60 | 94.74 ± 7.74 | <b>84.08 ± 2.99</b> | 61.63 ± 10.53       |
| RF         | 82.22 ± 7.42 | 69.17 ± 11.32 | 83.73 ± 9.37 | 84.15 ± 3.00        | 46.58 ± 7.82        | 94.41 ± 1.06 | 57.71 ± 5.34 | 98.63 ± 0.96 | 78.06 ± 2.79        | 68.05 ± 5.11        | 92.87 ± 2.44 | 57.49 ± 7.86 | 96.89 ± 3.01 | 83.76 ± 3.19        | 62.88 ± 7.55        |
| Adaboost   | 53.79 ± 6.50 | 80.89 ± 7.52  | 50.68 ± 8.08 | 84.29 ± 2.22        | 37.33 ± 7.92        | 70.89 ± 1.78 | 69.11 ± 6.68 | 71.09 ± 3.27 | 78.15 ± 2.31        | 54.10 ± 5.37        | 78.95 ± 6.22 | 65.46 ± 7.28 | 80.50 ± 5.77 | 83.19 ± 3.20        | 52.01 ± 10.88       |
| GBT        | 88.14 ± 5.93 | 63.78 ± 9.54  | 90.94 ± 7.47 | 84.72 ± 2.98        | 54.99 ± 9.30        | 94.52 ± 0.61 | 57.78 ± 5.34 | 98.74 ± 0.43 | 78.08 ± 2.65        | 68.39 ± 4.22        | 93.96 ± 1.01 | 57.84 ± 5.74 | 98.11 ± 1.04 | 83.79 ± 3.23        | <b>66.40 ± 4.95</b> |

| SNMF       |              |              |              |                     |                      | SPCA         |              |               |                     |                     |
|------------|--------------|--------------|--------------|---------------------|----------------------|--------------|--------------|---------------|---------------------|---------------------|
| SNMF-F1    |              |              |              |                     |                      | SPCA-F1      |              |               |                     |                     |
| Method     | Accuracy     | Sensitivity  | Specificity  | AUC                 | F1-Score             | Accuracy     | Sensitivity  | Specificity   | AUC                 | F1-Score            |
| SVM-RBF    | 74.44 ± 4.86 | 66.83 ± 7.69 | 75.32 ± 5.49 | 78.85 ± 3.57        | 35.48 ± 5.23         | 49.07 ± 6.41 | 76.95 ± 7.24 | 45.86 ± 6.73  | 53.54 ± 4.89        | 35.33 ± 10.30       |
| SVM-Linear | 77.56 ± 3.80 | 69.59 ± 7.65 | 78.48 ± 4.62 | 81.38 ± 3.09        | 39.28 ± 3.95         | 81.47 ± 4.11 | 65.24 ± 5.53 | 83.33 ± 6.05  | 81.10 ± 6.89        | 52.01 ± 7.71        |
| PM         | 75.80 ± 5.13 | 72.22 ± 6.44 | 76.21 ± 6.23 | 81.47 ± 2.44        | 38.68 ± 4.49         | 65.14 ± 3.11 | 74.86 ± 7.28 | 64.02 ± 4.07  | 75.75 ± 2.52        | 30.69 ± 1.65        |
| LR-L1      | 90.35 ± 5.16 | 57.24 ± 7.60 | 94.16 ± 6.17 | 82.59 ± 3.24        | <b>57.47 ± 10.86</b> | 94.47 ± 0.68 | 56.51 ± 5.91 | 98.83 ± 3.75  | 77.67 ± 2.95        | <b>67.66 ± 4.84</b> |
| LR-L2      | 67.93 ± 3.98 | 62.29 ± 7.95 | 68.57 ± 4.90 | 73.71 ± 3.24        | 28.71 ± 2.98         | 89.82 ± 2.04 | 64.44 ± 6.02 | 92.74 ± 2.52  | <b>85.46 ± 2.02</b> | 56.90 ± 4.61        |
| RF         | 87.51 ± 5.39 | 63.71 ± 8.54 | 90.24 ± 6.71 | <b>84.40 ± 2.60</b> | 53.25 ± 8.71         | 87.51 ± 6.01 | 63.75 ± 7.25 | 90.24 ± 7.12  | 84.34 ± 2.90        | 53.72 ± 10.37       |
| Adaboost   | 76.53 ± 3.37 | 72.25 ± 5.96 | 77.02 ± 4.04 | 82.57 ± 3.31        | 39.05 ± 3.45         | 82.69 ± 8.61 | 68.86 ± 9.01 | 84.28 ± 10.46 | 84.28 ± 10.46       | 47.98 ± 9.91        |
| GBT        | 88.22 ± 4.70 | 62.86 ± 7.32 | 91.37 ± 5.69 | 83.46 ± 2.72        | 54.05 ± 8.62         | 90.05 ± 3.62 | 60.98 ± 8.11 | 93.39 ± 4.51  | 84.36 ± 2.87        | 56.94 ± 7.83        |

Table 12. Comparing the performance of DA and various machine learning techniques and the dimension reduction stage for CIP and F1-F3.

| Method     | F1            |               |               |                     |                      | F2            |               |               |                     |                     | F3            |               |               |                     |                      |
|------------|---------------|---------------|---------------|---------------------|----------------------|---------------|---------------|---------------|---------------------|---------------------|---------------|---------------|---------------|---------------------|----------------------|
|            | Accuracy      | Sensitivity   | Specificity   | AUC                 | F1-Score             | Accuracy      | Sensitivity   | Specificity   | AUC                 | F1-Score            | Accuracy      | Sensitivity   | Specificity   | AUC                 | F1-Score             |
| DA         | 92.57 ± 1.61  | 46.65 ± 10.10 | 99.24 ± 0.89  | 72.95 ± 5.17        | 60.97 ± 10.15        | 92.57 ± 1.61  | 46.65 ± 10.10 | 99.24 ± 0.89  | 72.95 ± 5.17        | 60.97 ± 10.15       | 92.57 ± 1.61  | 46.65 ± 10.10 | 99.24 ± 0.89  | 72.95 ± 5.17        | 60.97 ± 10.15        |
| SVM-RBF    | 85.53 ± 7.38  | 77.99 ± 13.99 | 86.62 ± 9.04  | 88.08 ± 6.69        | 59.84 ± 12.09        | 41.29 ± 38.38 | 79.43 ± 26.90 | 54.42 ± 22.95 | 54.52 ± 22.95       | 35.79 ± 19.01       | 68.53 ± 34.50 | 79.63 ± 16.39 | 66.84 ± 26.78 | 68.35 ± 33.71       | 53.20 ± 20.84        |
| SVM-Linear | 86.37 ± 7.39  | 77.07 ± 12.67 | 87.72 ± 8.85  | 88.17 ± 5.96        | <b>61.13 ± 12.35</b> | 89.28 ± 15.66 | 48.15 ± 14.05 | 95.26 ± 19.46 | 72.79 ± 4.61        | 58.77 ± 11.09       | 92.03 ± 3.31  | 73.34 ± 13.56 | 94.74 ± 3.86  | 87.10 ± 6.21        | <b>70.70 ± 11.57</b> |
| PM         | 55.42 ± 29.61 | 79.66 ± 23.76 | 52.11 ± 23.76 | 86.96 ± 5.87        | 39.93 ± 17.87        | 36.16 ± 35.99 | 80.82 ± 29.63 | 29.79 ± 35.20 | 72.42 ± 5.76        | 30.93 ± 13.91       | 81.65 ± 22.01 | 75.24 ± 14.26 | 82.61 ± 26.69 | 86.76 ± 5.21        | 60.97 ± 17.01        |
| LR-L1      | 83.25 ± 6.34  | 73.55 ± 12.99 | 84.65 ± 7.89  | 86.15 ± 5.96        | 53.99 ± 9.86         | 66.30 ± 36.98 | 58.50 ± 30.07 | 67.58 ± 37.58 | 71.53 ± 6.38        | 43.50 ± 18.01       | 90.03 ± 2.93  | 63.76 ± 13.52 | 93.85 ± 3.97  | 84.66 ± 5.11        | 61.99 ± 8.79         |
| LR-L2      | 84.67 ± 6.02  | 79.86 ± 9.98  | 85.37 ± 7.65  | <b>89.53 ± 4.06</b> | 58.49 ± 9.30         | 56.93 ± 39.46 | 67.72 ± 29.52 | 55.56 ± 38.86 | <b>73.06 ± 5.47</b> | 41.58 ± 18.73       | 89.55 ± 8.99  | 73.35 ± 12.32 | 91.91 ± 10.67 | 87.37 ± 5.60        | 66.19 ± 10.75        |
| RF         | 86.39 ± 7.31  | 67.79 ± 14.67 | 89.07 ± 9.55  | 87.20 ± 4.94        | 58.04 ± 11.16        | 89.17 ± 15.75 | 95.26 ± 19.46 | 86.92 ± 17.87 | 72.75 ± 5.94        | 57.78 ± 13.60       | 93.22 ± 2.59  | 61.98 ± 14.45 | 97.77 ± 2.68  | <b>87.72 ± 5.41</b> | 69.54 ± 11.03        |
| Adaboost   | 32.41 ± 27.18 | 94.69 ± 8.33  | 23.37 ± 32.09 | 86.81 ± 5.98        | 29.62 ± 11.30        | 19.09 ± 21.59 | 95.87 ± 14.23 | 18.33 ± 19.26 | 73.01 ± 5.38        | 25.63 ± 10.69       | 86.67 ± 17.48 | 66.05 ± 17.09 | 89.64 ± 21.51 | 84.92 ± 5.31        | 62.67 ± 15.77        |
| GBT        | 87.56 ± 5.81  | 70.49 ± 13.34 | 90.02 ± 6.83  | 87.35 ± 5.42        | 60.35 ± 12.15        | 92.35 ± 1.57  | 44.98 ± 9.58  | 99.24 ± 0.94  | 72.43 ± 4.83        | <b>59.44 ± 9.70</b> | 93.29 ± 2.37  | 64.46 ± 15.35 | 97.49 ± 2.33  | 87.62 ± 4.44        | 70.28 ± 12.30        |

| SNMF       |               |                |               |                     |                      | SPCA          |               |               |                     |                     |
|------------|---------------|----------------|---------------|---------------------|----------------------|---------------|---------------|---------------|---------------------|---------------------|
| SNMF-F1    |               |                |               |                     |                      | SPCA-F1       |               |               |                     |                     |
| Method     | Accuracy      | Sensitivity    | Specificity   | AUC                 | F1-Score             | Accuracy      | Sensitivity   | Specificity   | AUC                 | F1-Score            |
| SVM-RBF    | 52.38 ± 26.98 | 70.69 ± 49.67  | 22.22 ± 10.64 | 62.64 ± 23.04       | 29.93 ± 8.80         | 59.43 ± 36.90 | 75.96 ± 23.84 | 57.01 ± 29.02 | 63.25 ± 31.45       | 44.34 ± 20.18       |
| SVM-Linear | 75.04 ± 8.13  | 64.90 ± 19.38  | 76.54 ± 11.18 | 80.30 ± 5.90        | 40.17 ± 7.37         | 79.39 ± 2.28  | 67.98 ± 16.75 | 87.08 ± 17.41 | 79.81 ± 19.71       | 52.60 ± 13.07       |
| PM         | 69.85 ± 7.55  | 74.08 ± 11.26  | 69.17 ± 9.02  | 78.95 ± 5.12        | 39.33 ± 6.94         | 74.12 ± 11.05 | 65.57 ± 16.78 | 75.37 ± 14.57 | 80.40 ± 5.35        | 41.31 ± 9.61        |
| LR-L1      | 46.12 ± 26.99 | 59.55 ± 44.269 | 16.19 ± 10.90 | 52.91 ± 7.69        | 25.37 ± 8.91         | 80.32 ± 27.44 | 43.98 ± 25.16 | 85.70 ± 29.34 | 67.60 ± 5.98        | 45.86 ± 15.52       |
| LR-L2      | 57.97 ± 14.44 | 64.34 ± 57.10  | 19.23 ± 14.20 | 67.78 ± 7.80        | 26.45 ± 8.76         | 87.70 ± 3.99  | 58.03 ± 17.83 | 92.04 ± 6.37  | 84.87 ± 6.37        | 54.13 ± 10.32       |
| RF         | 83.93 ± 5.74  | 62.33 ± 15.44  | 87.09 ± 7.69  | 82.63 ± 6.16        | 49.91 ± 9.93         | 84.17 ± 6.01  | 68.37 ± 14.37 | 86.46 ± 7.80  | 85.71 ± 5.66        | 53.23 ± 10.03       |
| Adaboost   | 77.61 ± 6.37  | 74.48 ± 13.96  | 78.06 ± 7.84  | <b>84.51 ± 5.69</b> | 46.37 ± 8.66         | 76.30 ± 6.94  | 75.97 ± 16.25 | 76.33 ± 9.00  | 85.52 ± 6.06        | 45.28 ± 10.74       |
| GBT        | 81.86 ± 7.25  | 68.75 ± 11.74  | 83.78 ± 8.52  | 83.47 ± 5.99        | <b>50.58 ± 10.80</b> | 87.50 ± 4.39  | 71.38 ± 13.07 | 89.81 ± 5.84  | <b>86.52 ± 6.74</b> | <b>59.86 ± 8.92</b> |

supplementary C

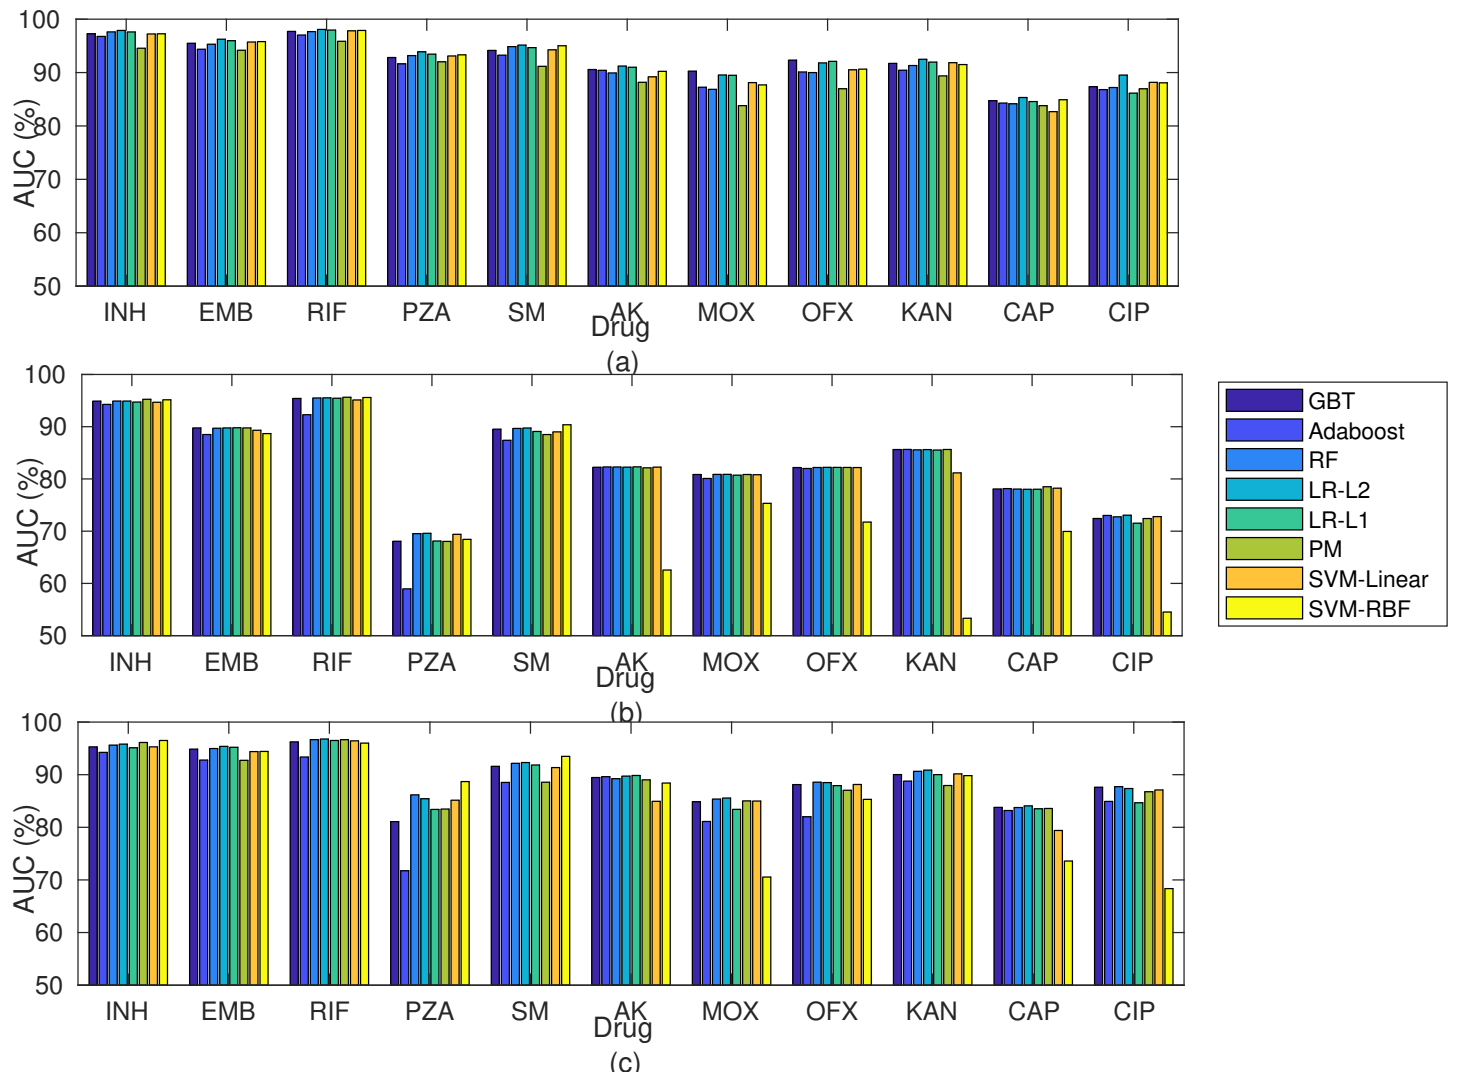

Fig. 1: Classification performance (AUC%) considering six machine learning classifiers across 11 anti-TB drugs and three feature spaces (a) F1, (b) F2, and (c) F3.

**F1-Score:** Considering F1 led to the best performing model for INH and PZA, F2 for AK and CAP and F3 for other drugs. Most models had similar F1-score based on F1 with exceptions of (F1 + PM) and (F1 + Adaboost) that resulted in good F1-Score only for INH, EMB, RIF, and PZA with addition to SM for Adaboost. Similarly, (F2 + Adaboost) performed similar to other techniques only for INH, EMB, RIF, AK, and KAN while (F2 + SVM-RBF) had lower F1-Score for AK, OFX, and KAN and (F1 + PM) for CAP and CIP. Most techniques performed the same considering F3. For all drugs, much higher F1-Score have obtained considering the top performed classifiers (supplementary C). The F1-Score improved by up to 12% for CAP (F2 + SVM-Linear), 9% for PZA and CIP (F1/F3 + SVM-Linear), 7% for KAN (F3 + GBT), 4% for OFX and up to 2% for other drugs compared to DA. The F1-Score is specially increased for PZA, KAN, and CAP that less than 10% isolates are resistant.

Most techniques performed similarly considering SPCA/SNMF except for considering (F1 + SPCA + PM) for all drugs, (F1 + SPCA + SVM-RBF) for AK and CAP, and (F1 + SPCA + Adaboost) for MOX, OFX, KAN, CAP, and CIP in comparison with other models. Furthermore, (F1 + SNMF + GBT) and (F1 + SNMF + LR-L1) was the top performing models considering F1-Score. Moreover, adding SPCA for the dimension reduction step enhanced the F1-score by up to 12.54%, 4.61%, 7.45%, and 9.58% for AK, MOX, OFX, and CAP respectively compared to considering the whole F1.

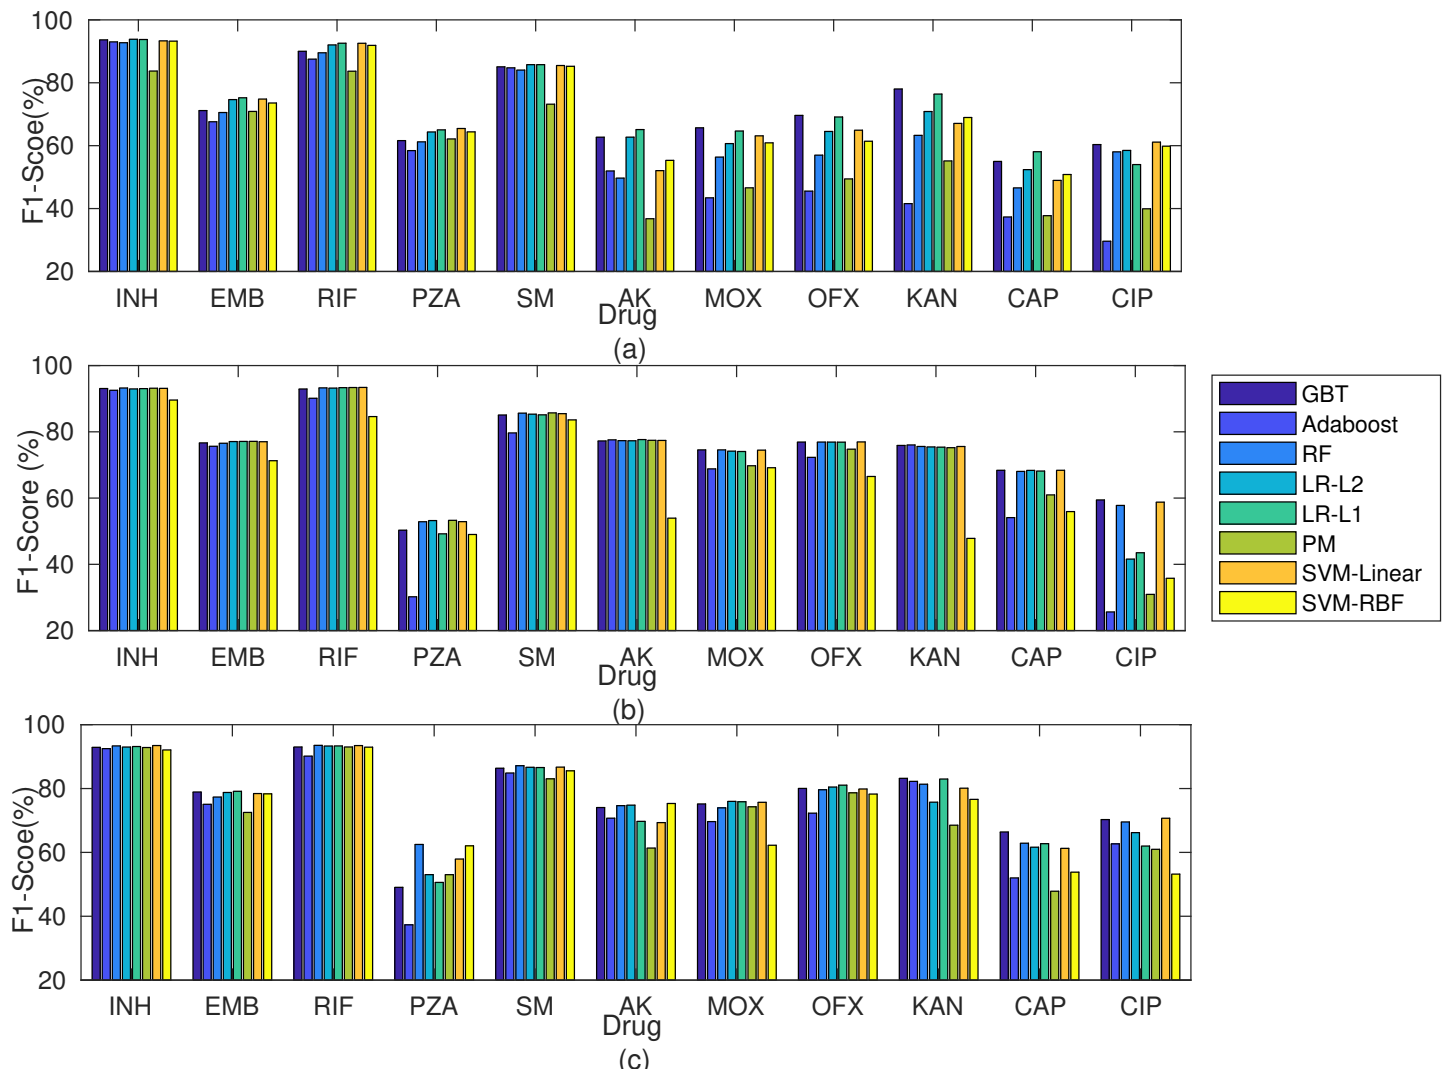

Fig. 2: Classification performance (F1-Score%) considering six machine learning classifiers across 11 anti-TB drugs and three feature spaces (a) F1, (b) F2, and (c) F3.

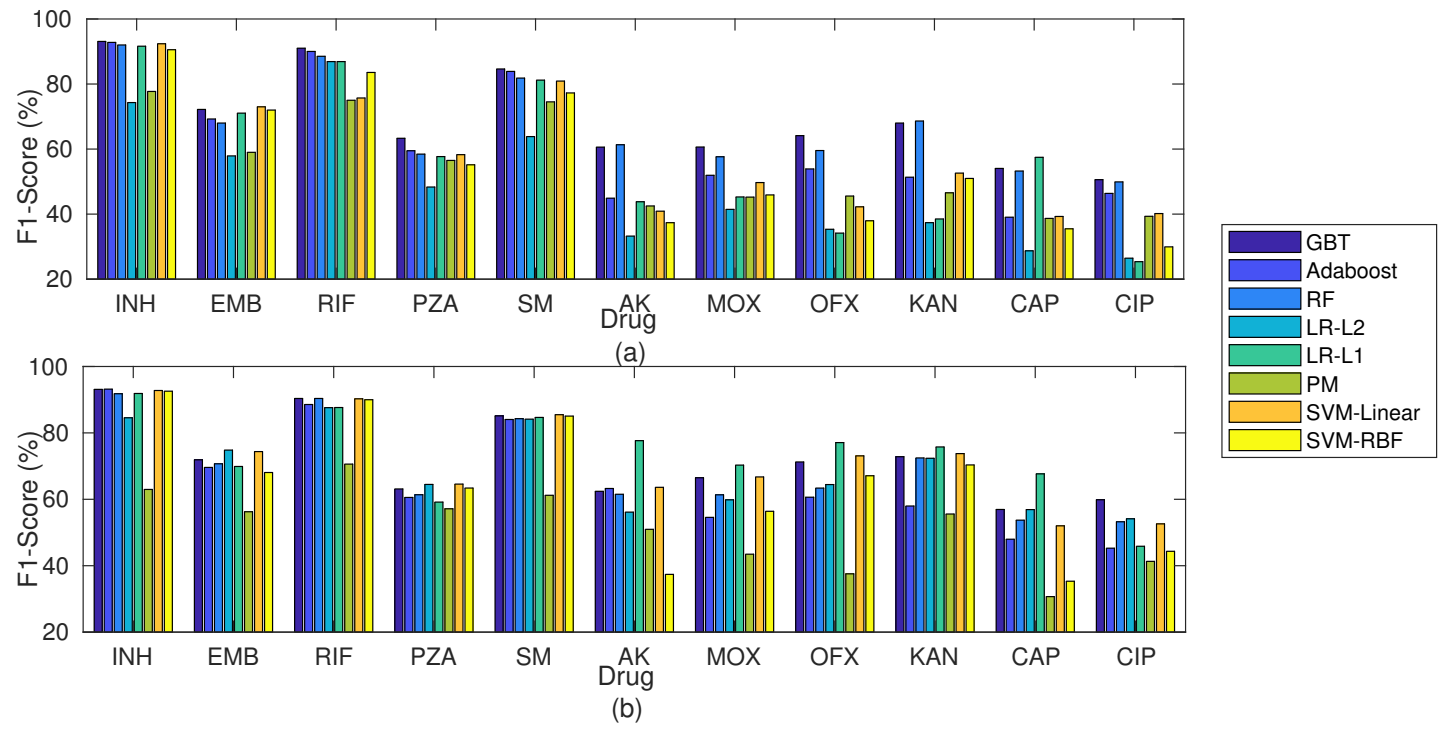

Fig. 3: Classification performance (F1-Score%) considering six machine learning classifiers across 11 anti-TB drugs and (a) SNMF-F1 and (b) SPCA-F1.



supplementary D

Table 13. Top 10 mutations ranked by LR-L1, LR-L2, and GBT; resistance/susceptible-associated mutations to each given drug are indicated in the boldface. The other mutations are either known to be related to other drugs or not in the library.

| INH                | EMB                | RIF               | PZA               | SM               | AK                | OFX              | MOX              | KAN               | CAP               | CIP              |
|--------------------|--------------------|-------------------|-------------------|------------------|-------------------|------------------|------------------|-------------------|-------------------|------------------|
| LR-L1              |                    |                   |                   |                  |                   |                  |                  |                   |                   |                  |
| rrs_A1401G         | <b>embB_M306V</b>  | <b>rpoB_S450L</b> | pncA_L120P        | <b>rpsL_K43R</b> | <b>rrs_A1401G</b> | gyrA_E21Q        | gyrA_D94A        | <b>rrs_A1401G</b> | <b>rrs_A1401G</b> | gyrA_G668D       |
| <b>katG_S315T</b>  | <b>embB_D328Y</b>  | <b>rpoB_D435V</b> | rpsA_A381V        | katG_S315T       | gidB_E92D         | gyrA_D94A        | <b>gyrA_D94G</b> | <b>eis_C-12T</b>  | pncA_C14G         | gyrA_S95T        |
| <b>fabG1_G-17T</b> | <b>embB_G406A</b>  | <b>rpoB_S450W</b> | <b>pncA_Q10P</b>  | <b>rpsL_K88R</b> | gyrA_D94A         | <b>gyrA_D94G</b> | <b>gyrA_A90V</b> | <b>eis_G-37T</b>  | <b>rrs_C1402T</b> | gyrA_E21Q        |
| eis_C-12T          | <b>embB_D1024N</b> | <b>rpoB_H445C</b> | pncA_G97S         | <b>rrs_A514C</b> | rmlD_L282L        | <b>gyrA_A90V</b> | <b>gyrA_D94N</b> | embA_Q38Q         | iniC_T89I         | gyrA_D94A        |
| <b>katG_S315N</b>  | <b>embB_Q497R</b>  | <b>rpoB_H445Y</b> | <b>pncA_C138R</b> | pncA_Y103H       | eis_C-14T         | <b>gyrA_D94N</b> | <b>gyrA_D94Y</b> | <b>eis_C-14T</b>  | pncA_A102P        | <b>gyrA_D94G</b> |
| <b>fabG1_C-15T</b> | embB_Y319S         | <b>rpoB_H445L</b> | <b>pncA_K96T</b>  | inhA_I194T       | embA_C-8T         | <b>gyrA_D94Y</b> | <b>gyrA_S91P</b> | <b>eis_G-10A</b>  | ndh_A209V         | pncA_D136G       |
| <b>fabG1_L203L</b> | <b>embB_D328G</b>  | <b>rpoB_V170F</b> | pncA_H51D         | <b>gidB_P75R</b> | gyrA_D94N         | <b>gyrA_S91P</b> | <b>gyrA_G88C</b> | inhA_I21T         | pncA_M175V        | <b>gyrA_A90V</b> |
| rpoB_V170F         | rrs_C513T          | <b>rpoB_H445D</b> | <b>pncA_G97D</b>  | gyrA_K542K       | pncA_Q141P        | <b>gyrA_G88C</b> | gyrB_E540D       | rpoB_D435G        | <b>tlyA_N236K</b> | gyrA_D94Y        |
| <b>ahpC_C-54T</b>  | <b>embA_C-11A</b>  | pncA_H51D         | <b>pncA_H57D</b>  | <b>gidB_G69D</b> | embB_Y334H        | gyrB_E540D       | gyrB_D500N       | embB_Y334H        | gidB_G62G         | <b>gyrA_S91P</b> |
| gidB_G71*          | <b>embA_C-16G</b>  | <b>rpoB_S450F</b> | <b>pncA_H57R</b>  | rpoB_T52P        | gidB_G62G         | <b>gyrA_D94H</b> | <b>gyrA_D94H</b> | gyrB_G77S         | embB_R507R        | iniA_S501W       |
| LR-L2              |                    |                   |                   |                  |                   |                  |                  |                   |                   |                  |
| <b>katG_S315T</b>  | embB_Y319S         | <b>rpoB_S450L</b> | katG_S315T        | katG_S315T       | <b>rrs_A1401G</b> | <b>gyrA_D94G</b> | <b>gyrA_D94G</b> | <b>rrs_A1401G</b> | <b>rrs_A1401G</b> | <b>gyrA_D94G</b> |
| <b>fabG1_C-15T</b> | <b>embB_M306V</b>  | pncA_H51D         | <b>pncA_H57D</b>  | <b>rpsL_K43R</b> | gyrA_E21Q         | <b>gyrA_A90V</b> | <b>gyrA_A90V</b> | <b>eis_G-10A</b>  | <b>rrs_C1402T</b> | gyrA_D94A        |
| <b>fabG1_L203L</b> | <b>embB_D328G</b>  | <b>rpoB_H445Y</b> | pncA_L120P        | <b>rpsL_K88R</b> | gidB_S100F        | <b>gyrA_S91P</b> | <b>gyrA_D94Y</b> | <b>eis_C-14T</b>  | embB_R507R        | pncA_D136G       |
| <b>katG_S315N</b>  | <b>embB_M306I</b>  | <b>rpoB_H445D</b> | katG_S315N        | <b>rrs_A514C</b> | katG_S315T        | <b>gyrA_D94A</b> | <b>gyrA_D94A</b> | <b>eis_G-37T</b>  | gidB_G62G         | <b>gyrA_A90V</b> |
| rpoB_S450L         | <b>embB_Q497R</b>  | <b>rpoB_D435V</b> | rpsA_A381V        | rrs_C517T        | eis_C-14T         | <b>gyrA_G88C</b> | <b>gyrA_S91P</b> | gyrB_G77S         | pncA_D12N         | gyrA_S95T        |
| rpoB_V170F         | <b>embA_C-16G</b>  | <b>rpoB_V170F</b> | pncA_H51D         | inhA_I194T       | pncA_T142A        | <b>gyrA_D94N</b> | <b>gyrA_D94N</b> | gyrA_E21Q         | gyrA_E21Q         | embB_M306I       |
| <b>fabG1_G-17T</b> | <b>embB_G406A</b>  | <b>rpoB_S450W</b> | <b>pncA_G97D</b>  | <b>gidB_P75R</b> | rpoB_C-61T        | <b>gyrA_D94H</b> | <b>gyrA_D94H</b> | embA_Q38Q         | ndh_Y108C         | <b>gyrA_S91P</b> |
| rpoB_D435V         | <b>embA_C-11A</b>  | <b>rpoB_H445L</b> | <b>rpsA_A440T</b> | rrs_G878A        | embB_Y334H        | <b>gyrA_D94Y</b> | <b>gyrA_G88C</b> | embB_Y334H        | iniC_T89I         | katG_C-85T       |
| rpoB_S450W         | <b>embB_M306L</b>  | <b>rpoB_H445R</b> | <b>pncA_Q10P</b>  | gyrA_K542K       | pncA_P62S         | gyrA_E21Q        | gyrB_D500N       | <b>eis_C-12T</b>  | rpoB_C-61T        | rpoB_V168A       |
| rpsA_A381V         | <b>embB_D1024N</b> | <b>rpoB_S450F</b> | katG_V473L        | <b>rrs_A906G</b> | gidB_G62G         | gyrB_E540D       | inhA_I21V        | pncA_H57R         | pncA_F13L         | embB_D869E       |
| GBT                |                    |                   |                   |                  |                   |                  |                  |                   |                   |                  |
| <b>katG_S315T</b>  | katG_S315T         | <b>rpoB_S450L</b> | katG_S315T        | katG_S315T       | <b>rrs_A1401G</b> | <b>gyrA_D94G</b> | <b>gyrA_D94G</b> | <b>rrs_A1401G</b> | <b>rrs_A1401G</b> | <b>gyrA_D94G</b> |
| <b>fabG1_C-15T</b> | <b>embB_M306V</b>  | katG_S315T        | <b>pncA_H57D</b>  | <b>rpsL_K43R</b> | pncA_T142A        | <b>gyrA_A90V</b> | <b>gyrA_A90V</b> | <b>eis_G-10A</b>  | <b>rrs_C1402T</b> | gyrA_D94A        |
| <b>fabG1_L203L</b> | rpoB_S450L         | <b>rpoB_H445Y</b> | rpoB_S450L        | <b>rpsL_K88R</b> | pncA_T135S        | <b>gyrA_S91P</b> | <b>gyrA_D94Y</b> | <b>eis_C-14T</b>  | embB_R507R        | pncA_D136G       |
| <b>katG_S315N</b>  | <b>embB_M306I</b>  | <b>rpoB_H445D</b> | embB_M306V        | <b>rrs_A514C</b> | rrs_G1016C        | <b>gyrA_D94A</b> | <b>gyrA_D94A</b> | <b>eis_G-37T</b>  | gidB_G62G         | <b>gyrA_A90V</b> |
| rpoB_S450L         | <b>embB_Q497R</b>  | <b>rpoB_D435V</b> | <b>pncA_A-11G</b> | rrs_C517T        | embC_L121L        | <b>gyrA_G88C</b> | <b>gyrA_S91P</b> | gyrB_G77S         | pncA_D12N         | rpoB_N437D       |
| rpoB_V170F         | <b>embA_C-16G</b>  | <b>rpoB_V170F</b> | embB_M306I        | rpoB_S450L       | tlyA_E186E        | <b>gyrA_D94N</b> | <b>gyrA_D94N</b> | gidB_G62G         | katG_V423I        | eis_G-10A        |
| katG_G699E         | <b>embB_G406A</b>  | <b>rpoB_S450W</b> | embB_G406A        | pncA_A38A        | iniA_I415V        | <b>gyrA_D94H</b> | <b>gyrA_D94H</b> | pncA_T142A        | iniA_P177L        | gyrA_G88C        |
| rpoB_D435V         | <b>embA_C-12T</b>  | <b>rpoB_H445L</b> | embB_Q497R        | <b>gidB_G69D</b> | embC_A931T        | <b>gyrA_D94Y</b> | <b>gyrA_G88C</b> | embB_R507R        | iniA_L320L        | gyrB_S313R       |
| <b>ahpC_C-52T</b>  | <b>embB_M306L</b>  | <b>rpoB_H445R</b> | <b>pncA_Q10P</b>  | embB_M306V       | <b>rrs_G1484T</b> | embA_C-12T       | gyrB_D500N       | <b>eis_C-12T</b>  | pncA_A134D        | embR_A224A       |
| <b>katG_Q461P</b>  | <b>embB_D1024N</b> | <b>rpoB_L452P</b> | <b>rrs_A1401G</b> | <b>rrs_A906G</b> | rpsA_R212R        | katG_S315T       | katG_S315T       | eis_L241L         | <b>rrs_G1484T</b> | rpoB_T229T       |

Supplementary E

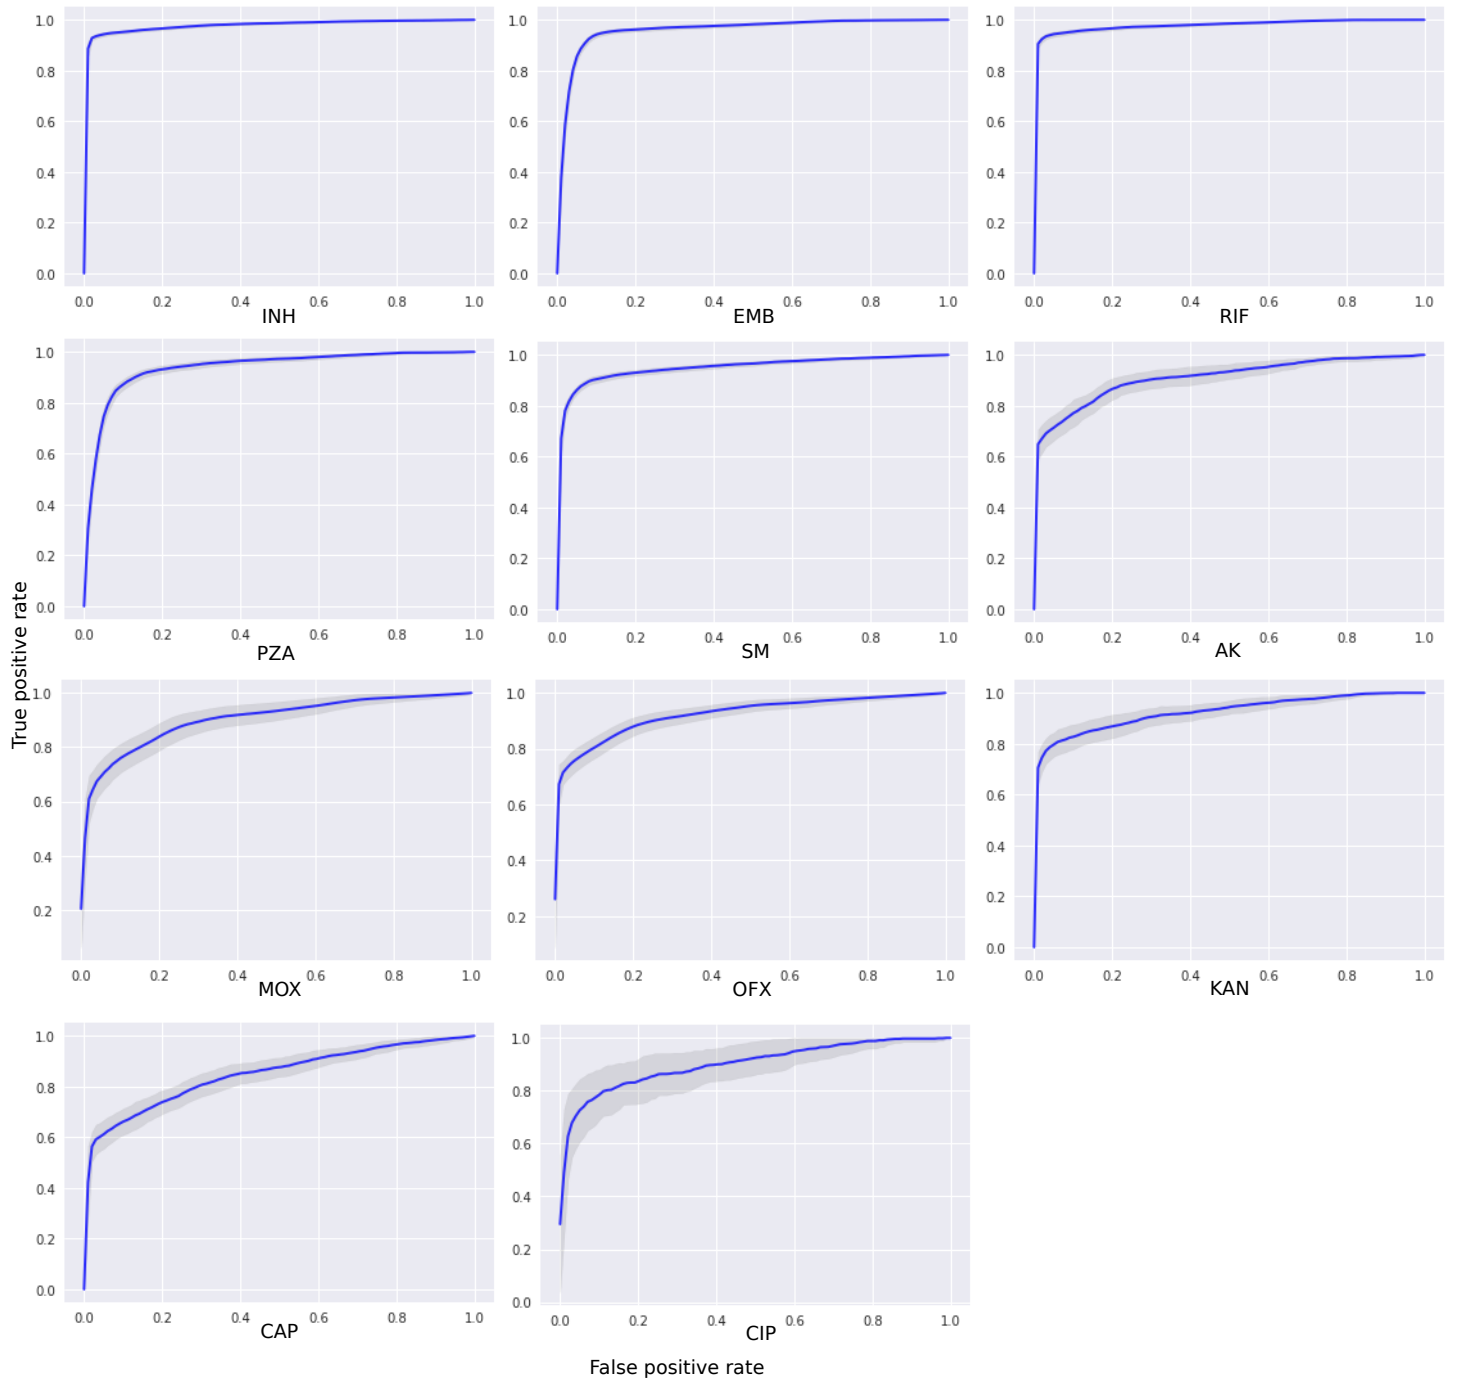

Fig. 4: Mean ROC ( $\pm$  STD) for the best performing model model for each drug on various test sets in various runs.

Supplementary F

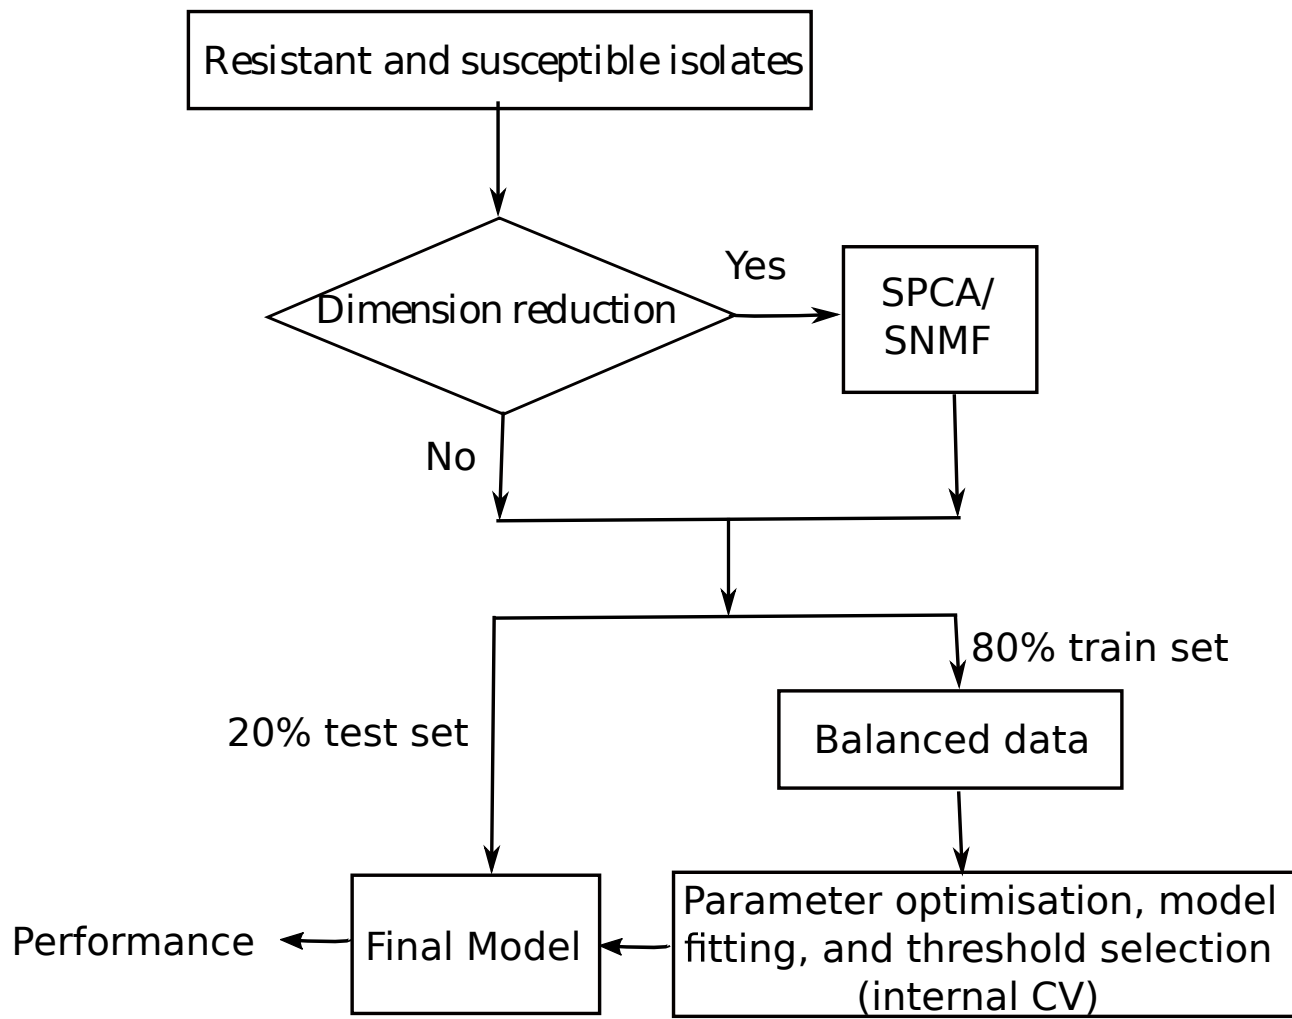

Fig. 5: The workflow for the examined classifiers.

**Supplementary G**

Table 14. A list of 23 candidate genes and their associated drugs.

| Genes                                          | Relevant drug |
|------------------------------------------------|---------------|
| ahpC, fabG1, inhA, katG, ndh                   | INH           |
| rpoB                                           | RIF           |
| embA, embB, embC, embR, iniA, iniC, manB, rmlD | EMB           |
| pncA, rpsA                                     | PZA           |
| gyrA, gyrB                                     | OFX, MOX, CIP |
| rpsL, gidB, rrs, tlyA                          | SM            |
| gidB, rrs, tlyA                                | AK and CAP    |
| gidB, rrs, tlyA, eis                           | KAN           |

Table 15. The number of features for each drug considering F3.

| Drug        | INH | EMB  | RIF | PZA | SM   | KAN  | AK   | CAP  | CIP | OFX | MOX |
|-------------|-----|------|-----|-----|------|------|------|------|-----|-----|-----|
| Susceptible | 678 | 2095 | 439 | 503 | 1075 | 1198 | 1029 | 1029 | 863 | 863 | 863 |

### Supplementary H

This section compares the performance of (F1 + LR-L2/GBT) and (F1 + SNMF/SPCA + LR-L2/GBT). LR-L2 was the top performing classifier considering the whole feature space while GBT performed best after considering the dimension reduction stage. (F1 + SNMF/SPCA + GBT) in comparison with (F1 + GBT) improved AUC for INH, EMB, RIF, PZA, SM, KAN, and AK, sensitivity for INH, KAN, and CIP, and specificity for EMB, RIF, PZA, CAP, MOX, and OFX ( $p < 0.01$ ). (F1 + SPCA + LR-L2) comparing with (F1 + LR-L2) resulted in higher AUC for CAP and AK, sensitivity for AK, MOX, and OFX, and specificity for INH, EMB, RIF, PZA, SM, KAN, CAP, CIP, and OFX ( $p < 0.01$ ).

Table 16. Comparing GBT performance considering 11 drugs and F1/(F1 + SNMF/SPCA). Sensitivity, specificity, and AUC (mean  $\pm$  standard error) are reported. Wilcoxon signed-rank test was used to calculate the p-value and  $^\circ$  indicates  $p < 0.01$ .

| Drugs | GBT               |                  |                  | SPCA/SNMF + Classifier     |                            |                           |                           |
|-------|-------------------|------------------|------------------|----------------------------|----------------------------|---------------------------|---------------------------|
|       | Sensitivity       | Specificity      | AUC              | Dimension reduction method | Sensitivity                | Specificity               | AUC                       |
| INH   | 91.77 $\pm$ 1.03  | 98.41 $\pm$ 0.32 | 97.26 $\pm$ 0.41 | SNMF                       | 92.18 $^\circ$ $\pm$ 0.98  | 97.79 $\pm$ 0.42          | 97.65 $^\circ$ $\pm$ 0.35 |
| EMB   | 92.68 $\pm$ 1.87  | 89.93 $\pm$ 1.35 | 95.49 $\pm$ 0.53 | SNMF                       | 92.15 $\pm$ 1.76           | 90.64 $^\circ$ $\pm$ 1.06 | 95.70 $^\circ$ $\pm$ 0.52 |
| RIF   | 92.39 $\pm$ 1.34  | 96.27 $\pm$ 1.23 | 97.71 $\pm$ 0.35 | SNMF                       | 92.30 $\pm$ 1.43           | 96.69 $^\circ$ $\pm$ 0.77 | 97.79 $^\circ$ $\pm$ 0.39 |
| PZA   | 88.49 $\pm$ 2.76  | 87.22 $\pm$ 1.86 | 92.82 $\pm$ 0.98 | SNMF                       | 88.14 $\pm$ 2.46           | 88.34 $^\circ$ $\pm$ 1.36 | 93.50 $^\circ$ $\pm$ 0.82 |
| SM    | 87.90 $\pm$ 1.69  | 93.28 $\pm$ 1.21 | 94.15 $\pm$ 0.81 | SNMF                       | 87.45 $\pm$ 2.14           | 93.16 $\pm$ 1.40          | 95.09 $^\circ$ $\pm$ 0.61 |
| AK    | 73.82 $\pm$ 7.72  | 92.68 $\pm$ 5.97 | 90.57 $\pm$ 2.67 | SPCA                       | 73.40 $\pm$ 8.07           | 92.60 $\pm$ 6.13          | 90.94 $^\circ$ $\pm$ 2.45 |
| MOX   | 76.84 $\pm$ 9.29  | 87.19 $\pm$ 8.21 | 90.27 $\pm$ 2.96 | SPCA                       | 71.35 $\pm$ 7.55           | 90.76 $^\circ$ $\pm$ 3.97 | 88.78 $\pm$ 3.29          |
| OFX   | 79.06 $\pm$ 6.94  | 90.88 $\pm$ 6.38 | 92.33 $\pm$ 1.49 | SPCA                       | 72.70 $\pm$ 6.16           | 94.27 $^\circ$ $\pm$ 3.78 | 91.61 $\pm$ 1.82          |
| KAN   | 78.27 $\pm$ 6.80  | 97.04 $\pm$ 2.43 | 91.72 $\pm$ 2.88 | SPCA                       | 78.29 $^\circ$ $\pm$ 6.28  | 93.14 $\pm$ 4.58          | 91.91 $^\circ$ $\pm$ 2.04 |
| CAP   | 63.78 $\pm$ 9.54  | 90.94 $\pm$ 7.47 | 84.72 $\pm$ 2.98 | SPCA                       | 60.98 $\pm$ 8.11           | 93.39 $^\circ$ $\pm$ 4.51 | 84.36 $\pm$ 2.87          |
| CIP   | 70.49 $\pm$ 13.34 | 90.02 $\pm$ 6.83 | 87.35 $\pm$ 5.42 | SPCA                       | 71.38 $^\circ$ $\pm$ 13.07 | 89.81 $\pm$ 5.84          | 86.52 $\pm$ 6.74          |

Table 17. Comparing LR-L2 performance considering 11 drugs and F1/(F1 + SNMF/SPCA). Sensitivity, specificity, and AUC (mean  $\pm$  standard error) are reported. Wilcoxon signed-rank test was used to calculate the p-value and  $^\circ$  indicates  $p < 0.01$ .

| Drugs | LR-L2            |                  |                  | SPCA/SNMF + Classifier     |                           |                           |                           |
|-------|------------------|------------------|------------------|----------------------------|---------------------------|---------------------------|---------------------------|
|       | Sensitivity      | Specificity      | AUC              | Dimension reduction method | Sensitivity               | Specificity               | AUC                       |
| INH   | 92.19 $\pm$ 0.94 | 98.38 $\pm$ 0.29 | 97.89 $\pm$ 0.38 | SPCA                       | 75.69 $\pm$ 1.39          | 98.74 $^\circ$ $\pm$ 0.22 | 96.52 $\pm$ 0.39          |
| EMB   | 92.12 $\pm$ 1.84 | 91.89 $\pm$ 0.84 | 96.25 $\pm$ 0.54 | SPCA                       | 86.80 $\pm$ 1.67          | 93.30 $^\circ$ $\pm$ 0.55 | 95.57 $\pm$ 0.48          |
| RIF   | 92.77 $\pm$ 1.28 | 97.45 $\pm$ 0.63 | 98.08 $\pm$ 0.32 | SPCA                       | 82.95 $\pm$ 1.54          | 98.15 $^\circ$ $\pm$ 0.27 | 97.10 $\pm$ 0.47          |
| PZA   | 88.12 $\pm$ 2.65 | 88.91 $\pm$ 1.66 | 93.89 $\pm$ 0.80 | SPCA                       | 81.96 $\pm$ 2.35          | 90.70 $^\circ$ $\pm$ 0.56 | 92.30 $\pm$ 0.78          |
| SM    | 87.40 $\pm$ 1.98 | 94.15 $\pm$ 1.23 | 95.15 $\pm$ 0.56 | SPCA                       | 81.37 $\pm$ 1.82          | 95.72 $^\circ$ $\pm$ 0.65 | 93.20 $\pm$ 0.78          |
| AK    | 73.51 $\pm$ 9.09 | 92.20 $\pm$ 7.53 | 91.22 $\pm$ 2.35 | SPCA                       | 77.23 $^\circ$ $\pm$ 6.96 | 89.84 $\pm$ 3.05          | 91.37 $^\circ$ $\pm$ 2.36 |
| MOX   | 80.08 $\pm$ 9.26 | 81.35 $\pm$ 9.29 | 89.55 $\pm$ 2.84 | SPCA                       | 80.27 $^\circ$ $\pm$ 5.97 | 81.25 $\pm$ 4.87          | 88.68 $\pm$ 2.46          |
| OFX   | 79.04 $\pm$ 7.74 | 87.78 $\pm$ 6.43 | 91.81 $\pm$ 1.63 | SPCA                       | 79.04 $^\circ$ $\pm$ 4.23 | 88.33 $^\circ$ $\pm$ 2.28 | 90.84 $\pm$ 1.54          |
| KAN   | 80.41 $\pm$ 6.48 | 93.48 $\pm$ 4.93 | 92.49 $\pm$ 2.93 | SPCA                       | 79.89 $\pm$ 5.03          | 94.81 $^\circ$ $\pm$ 1.58 | 90.52 $\pm$ 2.53          |
| CAP   | 67.52 $\pm$ 8.61 | 87.65 $\pm$ 9.23 | 85.33 $\pm$ 2.56 | SPCA                       | 64.44 $\pm$ 6.02          | 92.74 $^\circ$ $\pm$ 2.52 | 85.46 $^\circ$ $\pm$ 2.02 |
| CIP   | 79.86 $\pm$ 9.98 | 85.37 $\pm$ 7.65 | 89.53 $\pm$ 4.06 | SPCA                       | 58.03 $\pm$ 17.83         | 92.04 $^\circ$ $\pm$ 6.37 | 84.87 $\pm$ 6.37          |

Supplementary I

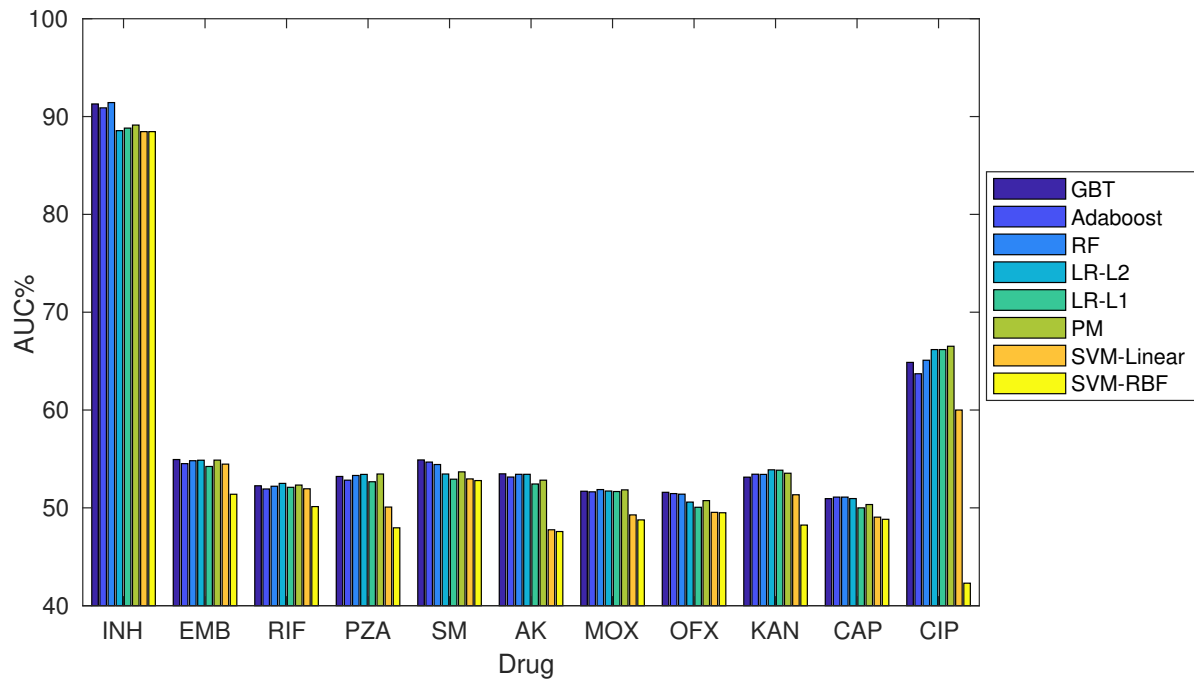

Fig. 6: Classification performance (AUC%) considering six machine learning classifiers across 11 anti-TB drugs and F1 + binary matrix factorisation (BMF).

**Supplementary J**

Here, we compared the performance of (F1 + SPCA/SNMF + GBT) for all drugs keeping 50, 100, and 150 components. Considering different number of components in (F1 + SNMF + GBT) resulted in similar performance for all drugs except for CIP and RIF. Keeping lower components showed to improve the performance of CIP and RIF. Considering higher number of components in (F1 + SPCA + GBT) indicated no effect on the performance for most of drugs but can improve the performance for MOX and OFX drugs.

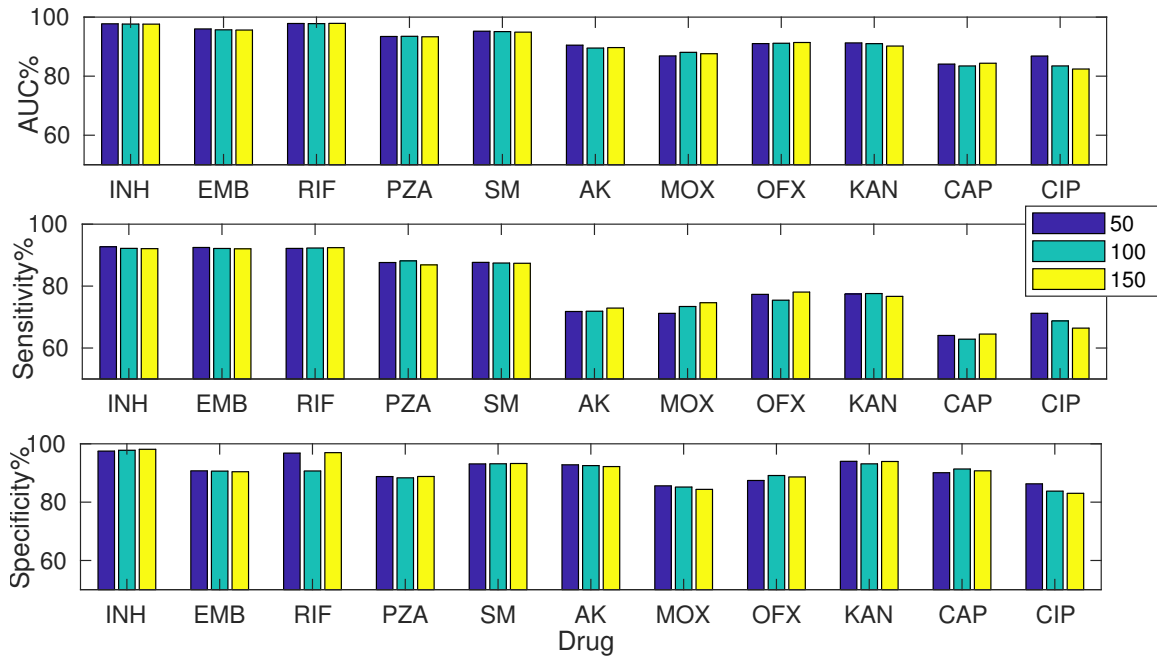

Fig. 7: Performance comparison in terms of AUC, sensitivity, and specificity considering 50, 100, and 150 components in (F1 + SNMF + GBT).

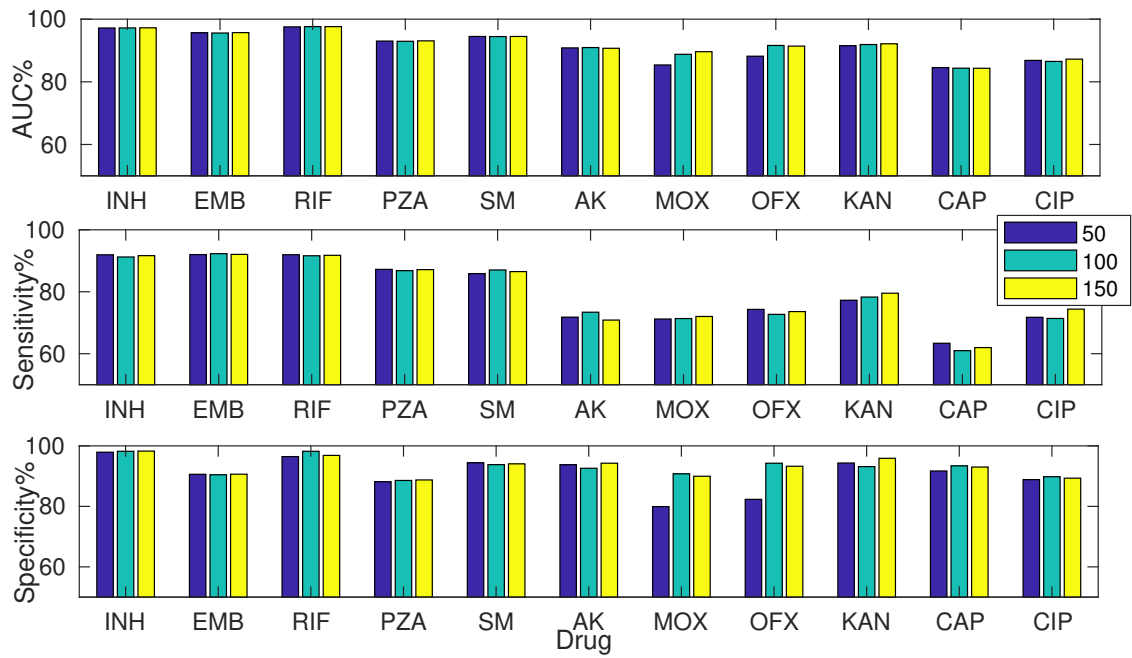

Fig. 8: Performance comparison in terms of AUC, sensitivity, and specificity considering 50, 100, and 150 components in (F1 + SNMF + GBT).

### Supplementary K

The work presented by (Yang *et al.*, 2017) used the threshold that maximises the accuracy. There was no explanation on threshold setting in (Farhat *et al.*, 2016) but they set the RF parameters by maximising the sum of sensitivity and specificity.

Table 18. Comparing our best performance with the one reported in the work published by Yang et al. and Farhat et al.

| Drugs | Our Performance |              |              | Yang et al  |             |          | Farhat et al |             |
|-------|-----------------|--------------|--------------|-------------|-------------|----------|--------------|-------------|
|       | Sensitivity     | Specificity  | AUC          | Sensitivity | Specificity | AUC      | Sensitivity  | Specificity |
| INH   | 92.19 ± 0.94    | 98.38 ± 0.29 | 97.89 ± 0.38 | 97 ± 0.3    | 94 ± 0.4    | 99 ± 0.0 | 96 ± 1       | 98 ± 2      |
| EMB   | 92.12 ± 0.98    | 91.89 ± 0.84 | 96.25 ± 0.54 | 97 ± 1.0    | 96 ± 0.6    | 99 ± 0.1 | 84 ± 2       | 91 ± 2      |
| RIF   | 92.27 ± 1.25    | 97.45 ± 0.63 | 98.08 ± 0.32 | 97 ± 0.4    | 97 ± 0.4    | 99 ± 0.1 | 93 ± 1       | 98 ± 1      |
| PZA   | 88.12 ± 2.65    | 88.91 ± 1.66 | 93.89 ± 0.80 | 84 ± 1.2    | 90 ± 1.1    | 95 ± 0.2 | 72 ± 2       | 97 ± 1      |
| SM    | 87.40 ± 1.98    | 94.15 ± 1.23 | 95.15 ± 0.56 | 87 ± 1.5    | 90 ± 1.0    | 91 ± 0.3 | 65 ± 2       | 97 ± 1      |
| AK    | 77.23 ± 6.96    | 89.84 ± 3.05 | 91.37 ± 2.36 | -           | -           | -        | 85 ± 3       | 98 ± 1      |
| MOX   | 76.84 ± 9.29    | 87.19 ± 8.21 | 90.27 ± 2.96 | 95 ± 1.4    | 93 ± 1.0    | 95 ± 0.4 | -            | -           |
| OFX   | 79.06 ± 6.94    | 90.88 ± 6.38 | 92.33 ± 1.49 | 96 ± 1.4    | 92 ± 1.3    | 95 ± 0.5 | 83 ± 5       | 90 ± 2      |
| KAN   | 80.41 ± 6.48    | 93.48 ± 4.93 | 92.49 ± 2.93 | -           | -           | -        | 66 ± 4       | 99 ± 0.5    |
| CAP   | 64.44 ± 6.02    | 92.74 ± 2.52 | 85.46 ± 2.02 | -           | -           | -        | 43 ± 3       | 96 ± 1      |
| CIP   | 79.86 ± 9.98    | 85.37 ± 7.65 | 89.53 ± 4.06 | 96 ± 0.9    | 98 ± 0.4    | 98 ± 0.3 | 56 ± 4       | 100 ± 0     |



Supplementary L

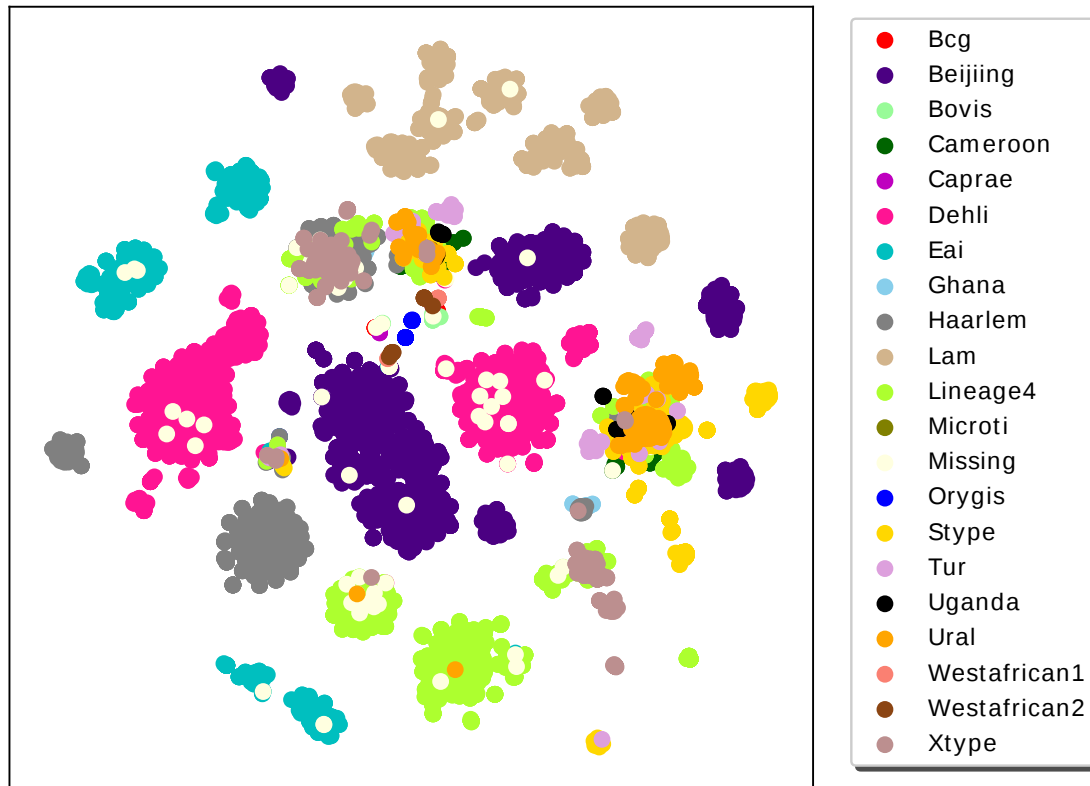

Fig. 9: t-distributed stochastic neighbour embedding (t-SNE) visualisation of isolates coloured based on the associated lineage. It confirms isolates sharing the same lineage mainly form their own cluster. t-SNE keeps the locality of the data while reducing the dimension and hence shows several lineages have patterns distinguishing them from others.

References

Farhat, M. R., Sultana, R., Iartchouk, O., Bozeman, S., Galagan, J., Sisk, P., Stolte, C., Nebenzahl-Guimaraes, H., Jacobson, K., Sloutsky, A., *et al.* (2016). Genetic determinants of drug resistance in mycobacterium tuberculosis and their diagnostic value. *American journal of respiratory and critical care medicine*, **194**(5), 621–630.

Yang, Y., Niehaus, K. E., Walker, T. M., Iqbal, Z., Walker, A. S., Wilson, D. J., Peto, T. E., Crook, D. W., Smith, E. G., Zhu, T., and Clifton, D. A. (2017). Machine learning for classifying tuberculosis drug-resistance from DNA sequencing data. *Bioinformatics*, **34**(10), 1666–1671.
